# Supplementary material for: Iminophosphorane in perylenediimide chemistry: Staudinger reaction and a visible-light-driven competitive reaction of the Cadogan cyclization
Source: Royal Society of Chemistry journal article supplement (doi:10.1039/d4qo01500b), 2024-01-01
Supplement: d4qo01500b1.pdf [file d4qo01500b1.pdf]

## **Iminophosphorane in Perylenediimide Chemistry: Staudinger Reaction and a Visible-Light-Driven Competitive Reaction of the Cadogan Cyclization**

Maxime Roger,<sup>1</sup> Oksana Krupka,<sup>2</sup> Olivier Alévêque,<sup>1</sup> Eric Levillain,<sup>1</sup> and Piétrick Hudhomme<sup>1,\*</sup>

<sup>1</sup> Univ Angers, CNRS, MOLTECH-Anjou, SFR MATRIX, F-49000 Angers, France.

E-mail: [pietrick.hudhomme@univ-angers.fr](mailto:pietrick.hudhomme@univ-angers.fr)

<sup>2</sup> Univ Angers, Inserm, CNRS, MINT, SFR ICAT, F-49000 Angers, France.

## Experimental details

### Table of content

|      |                                                  |    |
|------|--------------------------------------------------|----|
| I.   | Materials and Methods .....                      | 3  |
| II.  | Experimental Procedures .....                    | 5  |
| III. | Characterizations.....                           | 9  |
| 1.   | NMR, MS, IR.....                                 | 9  |
| 2.   | Absorption and fluorescence spectroscopies ..... | 25 |
| 3.   | Electrochemistry.....                            | 27 |
| 4.   | Spectroelectrochemistry .....                    | 27 |
| 5.   | Thermogravimetric analysis.....                  | 32 |
| 6.   | pH sensing experiments.....                      | 33 |

## I. Materials and Methods

**Chemicals** were purchased from Avocado (sodium azide), Alfa Aesar (triphenylphosphine).

NitroPDI **1** was prepared according to literature.<sup>1</sup>

**Solvents** were purchased from Fisher Scientific (DMF HPLC grade, MeOH HPLC grade, THF HPLC grade, CH<sub>2</sub>Cl<sub>2</sub> HPLC grade), Carlo Erba (CHCl<sub>3</sub>, CH<sub>2</sub>Cl<sub>2</sub>), deuterated solvent (CDCl<sub>3</sub>) from Sigma Aldrich. THF was dried over Na/benzophenone.

Thin layer chromatography (TLC) was conducted on pre-coated aluminum sheets with 0.20 mm Merck Alugram SIL G/UV254 with fluorescent indicator UV254. Column chromatography was carried out using Sigma-Aldrich silica gel 60 (particle size 63-200 μm).

Nuclear magnetic resonance (NMR) <sup>1</sup>H, <sup>13</sup>C, <sup>31</sup>P spectra were obtained on a Bruker 300 MHz Avance III spectrometer (300 MHz for <sup>1</sup>H and 75 MHz for <sup>13</sup>C) or 500 MHz Avance III HD spectrometer (500 MHz for <sup>1</sup>H, 125 MHz for <sup>13</sup>C, 202.4 MHz for <sup>31</sup>P). <sup>13</sup>C and <sup>31</sup>P spectra were recorded with a complete decoupling for the proton. <sup>19</sup>F spectra were recorded on a Bruker 300 MHz Avance III spectrometer (283 MHz for <sup>19</sup>F). Chemical shifts were reported in ppm according to tetramethylsilane using the solvent residual signal as an internal reference (CDCl<sub>3</sub>: <sup>1</sup>H = 7.26 ppm, <sup>13</sup>C = 77.16 ppm). Coupling constants (J) were given in Hz. Resonance multiplicity was described as s (singlet), d (doublet), t (triplet), q (quartet), tt (triplet of triplet), m (multiplet) and br.s. (broad singlet).

MALDI-TOF spectra were performed on a Bruker Daltonics Biflex III (SFR Matrix, MOLTECH-Anjou, Angers) using DCTB (trans-2-[3-(4-tert-butylphenyl)-2-methyl-2-propenylidene]malononitrile) as matrix. High resolution mass spectrometry (HRMS) was performed with a JEOL JMS-700 B/E.

UV-Visible absorption spectra were recorded on a Shimadzu UV-1800 UV-Vis spectrophotometer using quartz cell (pathlength of 1 cm).

Fluorescence was measured on a Shimadzu RF-6000 Spectrophotometer using quartz cell (pathlength of 1 cm).

Cyclic voltammetry experiments were carried out at room temperature in a glove box on a Bio-Logic SAS SP-150 potentiostat, with Pt electrode and counter-electrode and Ag as a reference electrode using 0.1 M *n*-Bu<sub>4</sub>NPF<sub>6</sub> in CH<sub>2</sub>Cl<sub>2</sub> as supporting electrolyte.

Thermogravimetric analyses (TGA) were carried out with a TA instruments Q500 apparatus under nitrogen atmosphere at a heating rate of 10 °C/min from room temperature up to 1000°C.

---

<sup>1</sup> El-Berjawi, R.; Hudhomme, P., *Dyes and Pigments* **2018**, *159*, 551-556.

The irradiation was done with a HCK1012-01-005 EvoluChem LED Spotlight (18 W) from HepatoChem  
 Its absorption spectrum is given below :

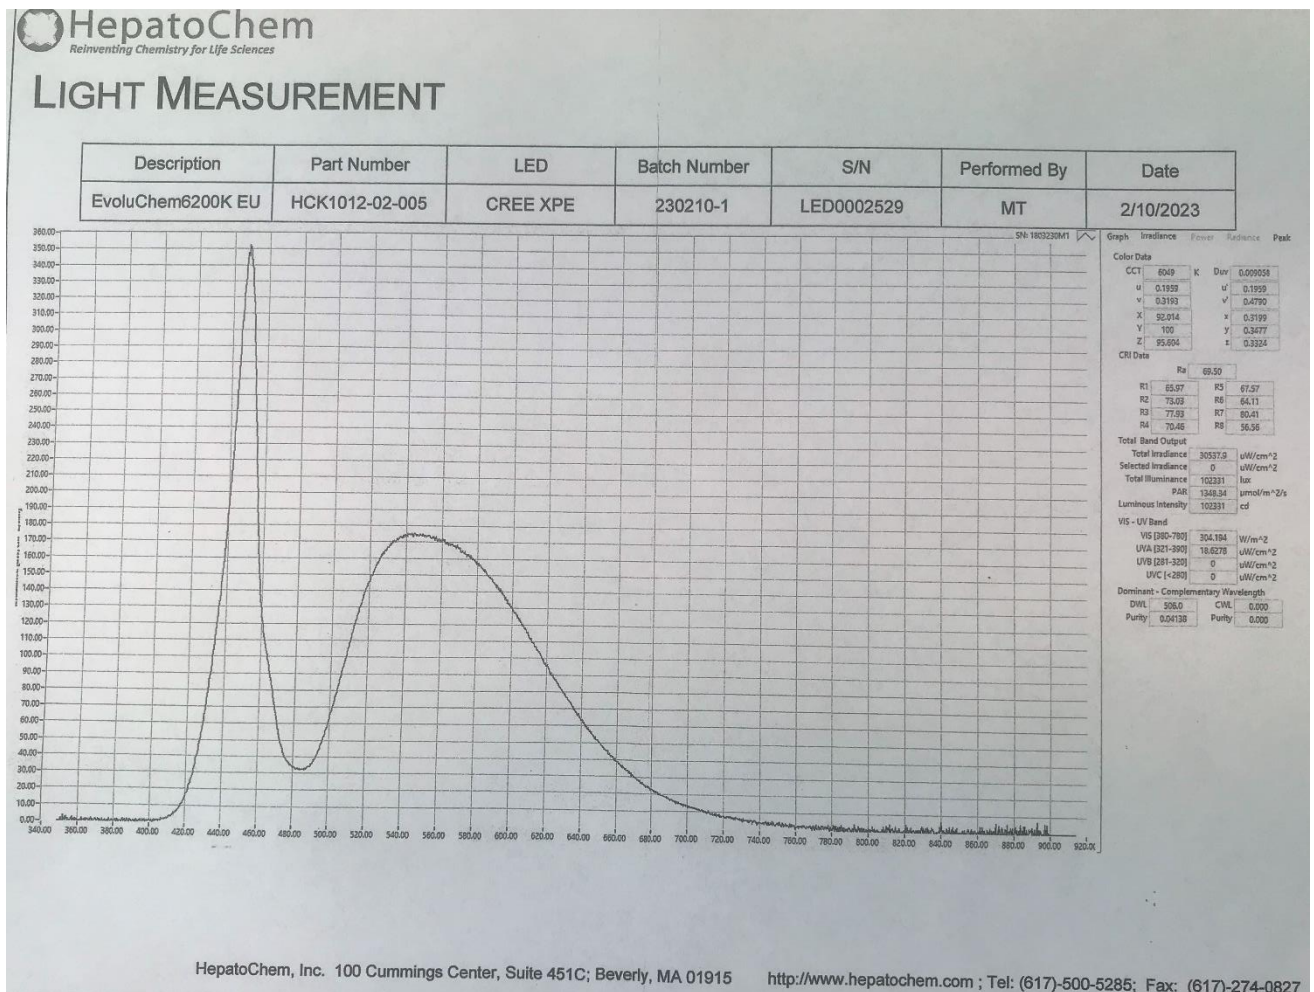

## II. Experimental Procedures

### Compound 4 :

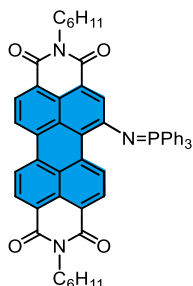

PDI-NO<sub>2</sub> **1** (240 mg, 0.4 mmol) was dissolved in THF / DMF mixture (15 mL; ratio : 1/1) and protected from light, then NaN<sub>3</sub> (31.2 mg, 0.48 mmol) was added. The mixture was stirred at room temperature for 3h until TLC analysis showed complete disappearance of the starting material. To this solution of intermediate azide **3**, PPh<sub>3</sub> (524.6 mg, 2.0 mmol) was added and the mixture was stirred for 48h. The solvent was removed under vacuum and the crude material was extracted using CHCl<sub>3</sub> - water mixture. The organic phase was dried over MgSO<sub>4</sub> then concentrated and the residue was purified by silica gel chromatography using CHCl<sub>3</sub> (100%) then CHCl<sub>3</sub> (98%) - ethyl acetate (2%) as the eluents. After precipitation in methanol, a blue-green powder was obtained (226 mg, yield: 68%).

PDI-NO<sub>2</sub> **1** (599 mg, 1 mmol) was dissolved in THF / DMF mixture (40 mL; ratio : 1/1) and protected from light, then NaN<sub>3</sub> (98 mg, 1.5 mmol) and PPh<sub>3</sub> (1.31 g, 5.0 mmol) were added. The mixture was stirred at room temperature for 72h. The solvent was removed under vacuum and the residue was purified by silica gel chromatography using CHCl<sub>3</sub> (100%) then CHCl<sub>3</sub> (98%) - ethyl acetate (2%) as the eluents. After precipitation in methanol, a blue-green powder was obtained (655 mg, yield: 79%).

<sup>1</sup>H NMR (500 MHz, CDCl<sub>3</sub>, 293 K), δ : 10.83 (d, *J*<sub>H-H</sub> = 8.5 Hz, 1H), 8.59 (d, *J*<sub>H-H</sub> = 8.1 Hz, 1H), 8.51 (d, *J*<sub>H-H</sub> = 8.1 Hz, 1H), 8.50 (d, *J*<sub>H-H</sub> = 8.3 Hz, 1H), 8.46 (d, *J*<sub>H-H</sub> = 8.2 Hz, 1H), 8.32 (d, *J* = 8.1 Hz, 1H), 7.99 (d, <sup>4</sup>*J*<sub>H-P</sub> = 1.6 Hz, 1H), 7.90 - 7.86 (m, 6H), 7.67- 7.63 (m, 3H), 7.60 – 7.56 (m, 6H), 5.09 (tt, *J*<sub>H-H</sub> = 12.1, 3.7 Hz, 1H, CH cyclohexyl), 4.87 (tt, *J*<sub>H-H</sub> = 12.1, 3.7 Hz, 1H, CH cyclohexyl), 2.68 - 2.56 (m, 2H, CH-CH<sub>2</sub> cyclohexyl), 2.50 - 2.42 (m, 2H, CH-CH<sub>2</sub> cyclohexyl), 2.02 - 1.62 (m, 10H, CH<sub>2</sub> cyclohexyl), 1.55 - 1.23 (m, 6H, CH<sub>2</sub> cyclohexyl).

<sup>13</sup>C NMR (125 MHz, CDCl<sub>3</sub>, 293 K), δ: 164.8, 164.7, 164.6, 164.1, 137.9, 135.7, 132.1, 132.9, 132.8, 132.8, 132.6, 131.8, 130.6, 130.5, 130.4, 129.6, 129.5, 129.5, 129.4, 129.3, 129.3, 128.7, 127.6, 126.4, 126.2, 123.5, 123.3, 123.2, 122.7, 122.5, 122.1, 120.5, 120.1, 53.8, 53.8, 29.3, 29.2, 26.8, 26.7, 25.7, 25.6 ppm.

<sup>31</sup>P NMR (202.4 MHz, CDCl<sub>3</sub>, 293 K, δ : 9.74.

HR-MS (MALDI-TOF, DCTB, negative mode) *m/z* = calc for C<sub>54</sub>H<sub>44</sub>N<sub>4</sub>O<sub>7</sub>P : 829.3069; found 829.3075 (0.77 ppm error).

λ, nm (ε, L.mol<sup>-1</sup>.cm<sup>-1</sup>) in CH<sub>2</sub>Cl<sub>2</sub>: 639 (42 200), 600 (36 500), 470 (5 500), 430 (20 800).

### Compound 5 :

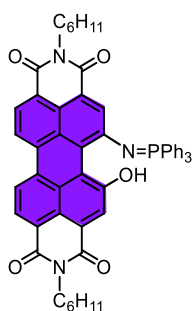

A solution of PDI-NO<sub>2</sub> (599 mg, 1 mmol) and PPh<sub>3</sub> (865 mg, 3.3 mmol) in anhydrous THF (100 mL) in a round-bottom flask was irradiated under white LED lamp for two hours and controlled by TLC (CHCl<sub>3</sub>/ethyl acetate: 96/4). The solution was concentrated then the crude material was purified by silica gel chromatography using CH<sub>2</sub>Cl<sub>2</sub> then CH<sub>2</sub>Cl<sub>2</sub>/EtOAc (90/10) as the mixture of eluents. After precipitation in methanol, a dark-violet powder was obtained (795 mg, yield: 94%).

The same reaction carried out in CH<sub>2</sub>Cl<sub>2</sub> yielded 794 mg (94% yield) of compound **5**.

<sup>1</sup>H NMR (500 MHz, CDCl<sub>3</sub>, 293 K, δ): 12.72 (s, 1H), 8.53 (s, 2H), 8.50 (s, 2H), 8.41 (s, 1H), 8.09 (d, <sup>4</sup>J<sub>H-H</sub> = 1.3 Hz, 1H), 7.75 – 7.69 (m, 6H), 7.65 – 7.60 (m, 3H), 7.55 – 7.50 (m, 6H), 5.09 (tt, J<sub>H-H</sub> = 12.2, 3.8 Hz, 1H, CH cyclohexyl), 4.92 (tt, J<sub>H-H</sub> = 12.2, 3.8 Hz, 1H, CH cyclohexyl), 2.63 (qd, J<sub>H-H</sub> = 12.2, 3.6 Hz, 2H, CH-CH<sub>2</sub> cyclohexyl), 2.49 (qd, J<sub>H-H</sub> = 12.4, 3.6 Hz, 2H, CH-CH<sub>2</sub> cyclohexyl), 1.99 – 1.62 (m, 11H, CH<sub>2</sub> cyclohexyl), 1.54 – 1.20 (m, 5H, CH<sub>2</sub> cyclohexyl) ppm.

<sup>13</sup>C NMR (125 MHz, CDCl<sub>3</sub>, 293 K, δ): 165.0, 164.7, 164.7, 164.2, 158.5, 144.1, 144.0, 133.7, 133.6, 133.6, 133.1, 133.0, 129.7, 129.6, 129.4, 128.8, 128.7, 128.6, 127.9, 127.8, 127.7, 127.2, 126.7, 125.9, 124.2, 124.0, 123.8, 122.7, 122.1, 122.0, 121.9, 121.3, 53.9, 53.8, 29.4, 29.2, 26.8, 26.7, 25.7, 25.6 ppm.

<sup>31</sup>P NMR (202.4 MHz, CDCl<sub>3</sub>, 293 K, δ): 20.23 ppm.

HR-MS (MALDI, DCTB, positive mode) m/z [M]<sup>•+</sup> calc for [C<sub>54</sub>H<sub>44</sub>N<sub>3</sub>O<sub>5</sub>P]<sup>•+</sup>: 845.3022; found 845.3013.

λ, nm (ε, L.mol<sup>-1</sup>.cm<sup>-1</sup>) in CH<sub>2</sub>Cl<sub>2</sub>: 594 (44 800), 556 (33 000), 429 (13 800).

### Compound 6 :

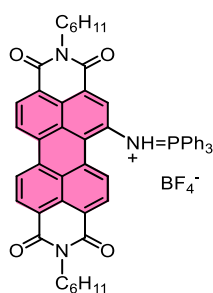

To a solution of 82.9 mg (0.1 mmol) of compound **4** in anhydrous  $\text{CH}_2\text{Cl}_2$  (10 mL) was added  $\text{HBF}_4 \cdot \text{Et}_2\text{O}$  50-55% in  $\text{Et}_2\text{O}$  (0.1 mL). After stirring for 5 min at room temperature, petroleum ether was added for the precipitation of compound **6**. The precipitate was filtered, washed with petroleum ether, dried under vacuum affording compound **6** in quantitative yield (91 mg).

$^1\text{H}$  NMR (500 MHz,  $\text{CDCl}_3$ , 293 K,  $\delta$ ): 9.28 (d,  $J_{\text{H-H}} = 8$  Hz, 1H), 8.69 (br.s, 1H), 8.56 (d,  $J_{\text{H-H}} = 8$  Hz, 1H), 8.50 (d,  $J_{\text{H-H}} = 8$  Hz, 1H), 8.42-8.39 (m, 3H), 8.36 (d,  $J_{\text{H-H}} = 8$  Hz, 1H), 7.61-7.57 (m, 9H), 7.48-7.45 (m, 6H), 5.00 (t,  $J_{\text{H-H}} = 12.2$  Hz, 1H, CH cyclohexyl), 4.90 (t,  $J_{\text{H-H}} = 12.2$  Hz, 1H, CH cyclohexyl), 2.55 (dq,  $J_{\text{H-H}} = 12.2$ , 3.6 Hz, 2H, CH- $\text{CH}_2$  cyclohexyl), 2.46 (dq,  $J_{\text{H-H}} = 12.4$ , 3.6 Hz, 2H, CH- $\text{CH}_2$  cyclohexyl), 1.94 – 1.87 (m, 4H,  $\text{CH}_2$  cyclohexyl), 1.80 – 1.70 (m, 6H,  $\text{CH}_2$  cyclohexyl), 1.50-1.25 (m, 6H,  $\text{CH}_2$  cyclohexyl) ppm.

$^{13}\text{C}$  NMR (125 MHz,  $\text{CDCl}_3$ , 293 K,  $\delta$ ): 163.9, 163.6, 163.5, 162.5, 135.6, 135.5, 134.1, 133.8, 133.7, 133.4, 133.3, 133.27, 133.2, 132.9, 131.2, 130.4, 130.2, 130.1, 129.0, 128.6, 127.8, 127.5, 126.5, 124.1, 124.0, 123.6, 123.5, 123.1, 119.7, 119.0, 54.3, 29.4, 29.1, 26.7, 26.6, 25.6, 25.5 ppm.

$^{31}\text{P}$  NMR (202.4 MHz,  $\text{CDCl}_3$ , 293 K,  $\delta$ ): 39.09 ppm.

$^{19}\text{F}$  NMR (283 MHz,  $\text{CDCl}_3$ , 293 K,  $\delta$ ): - 149.63 ppm.

### Compound 7 :

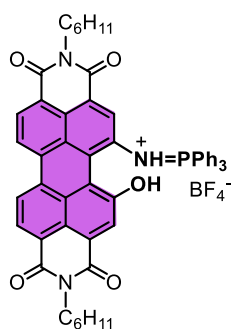

To a solution of 84.5 mg (0.1 mmol) of compound **5** in anhydrous CH<sub>2</sub>Cl<sub>2</sub> (10 mL) was added HBF<sub>4</sub>.Et<sub>2</sub>O 50-55% in Et<sub>2</sub>O (0.1 mL). After stirring for 5 min at room temperature, petroleum ether was added for the precipitation of compound **7**. The precipitate was filtered, washed with petroleum ether, dried under vacuum affording compound **7** in quantitative yield (93 mg).

The <sup>1</sup>H NMR spectrum clearly shows the presence of two isomeric forms. However, a single peak is present in the <sup>31</sup>P spectrum, suggesting effectively the presence of a single compound.

<sup>31</sup>P NMR (202.4 MHz, CDCl<sub>3</sub>, 293 K, δ): 34.06 ppm.



### III. Characterizations

#### 1. NMR spectra

##### Compound 4 :

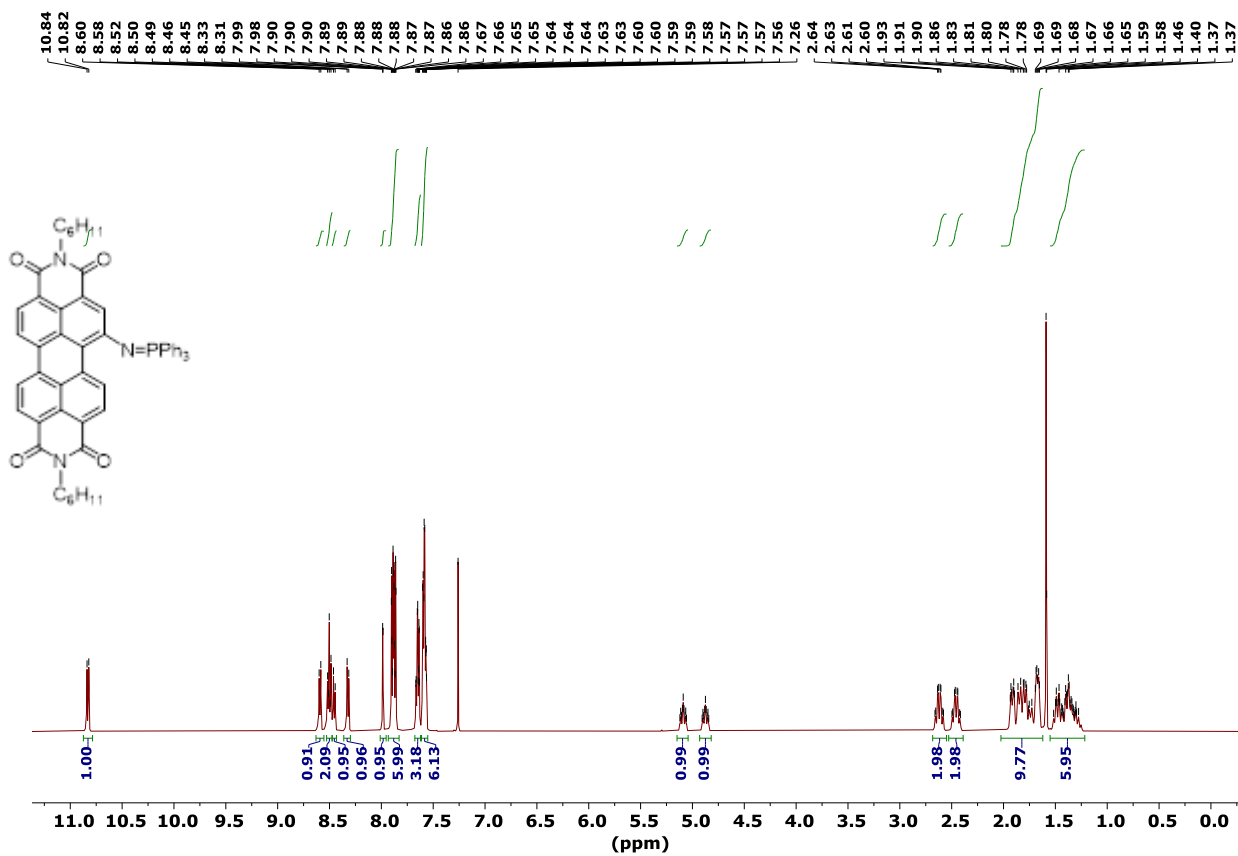

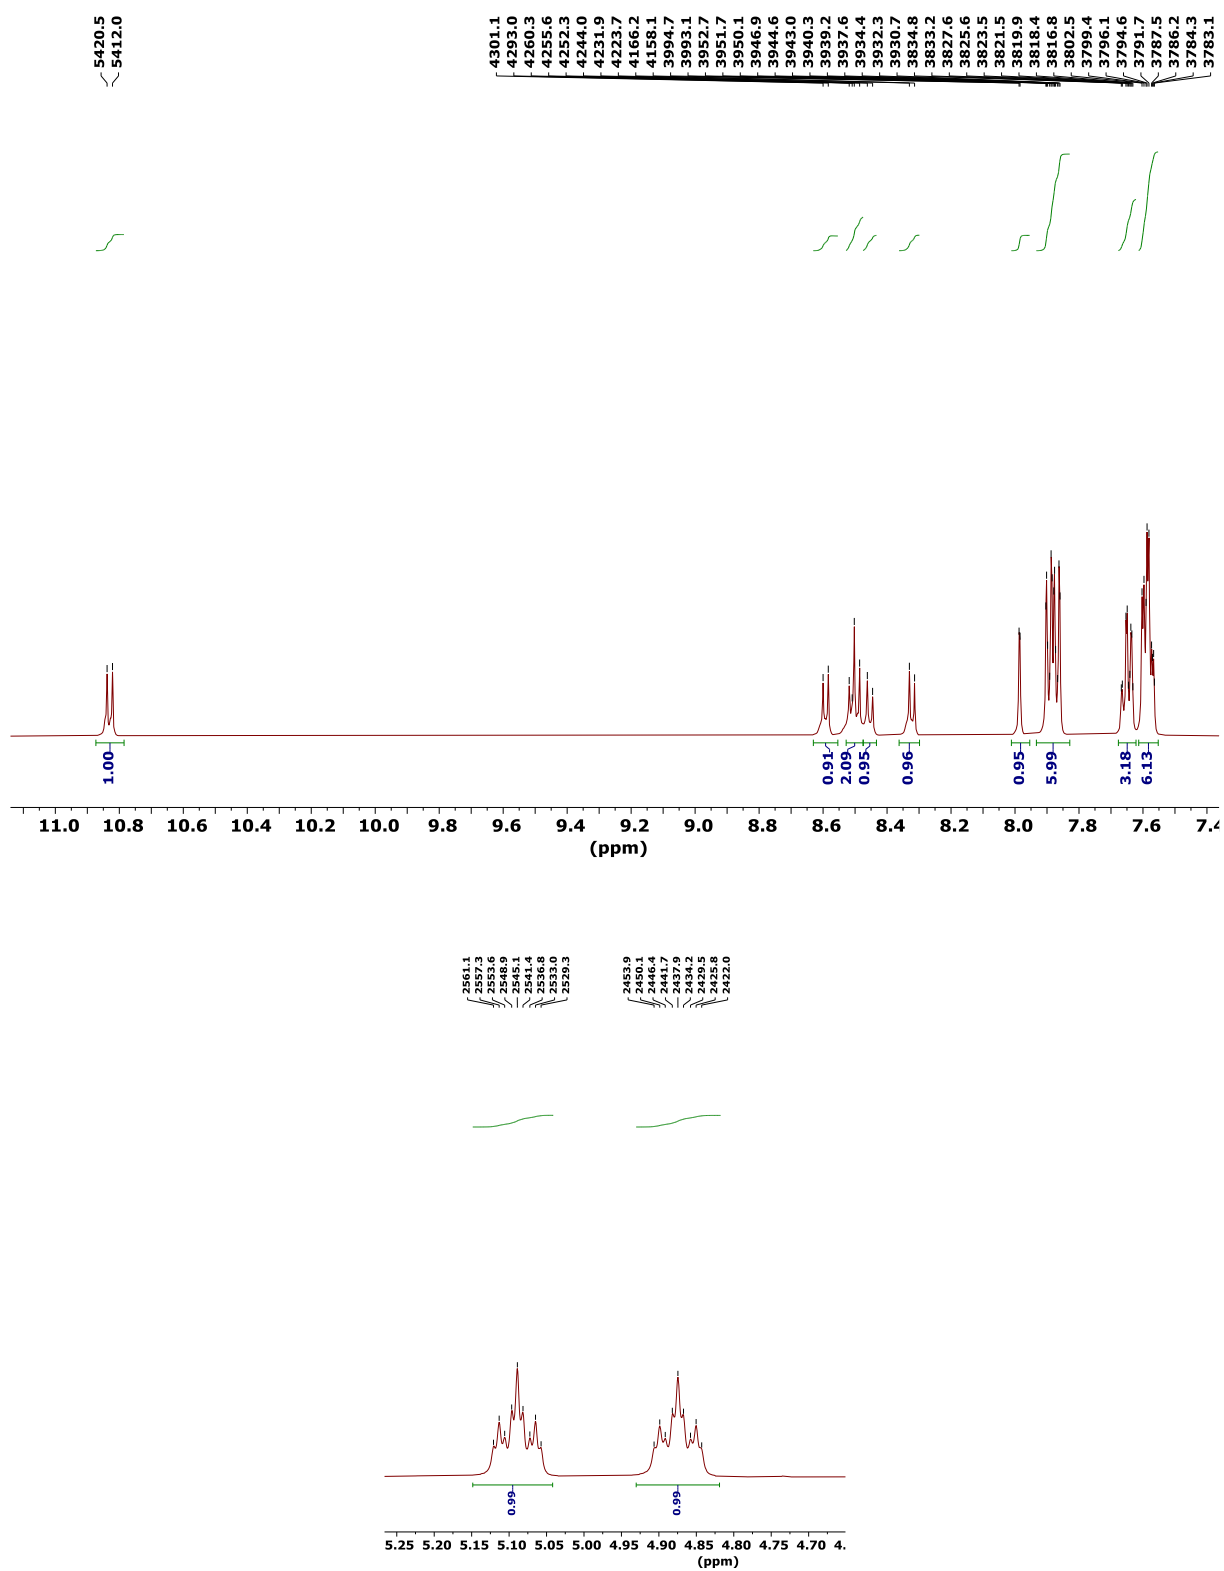

Figure S1: <sup>1</sup>H NMR (500 MHz, CDCl<sub>3</sub>, 293 K) of compound 4, enlargement of the aromatic region and protons of both cyclohexyl groups.

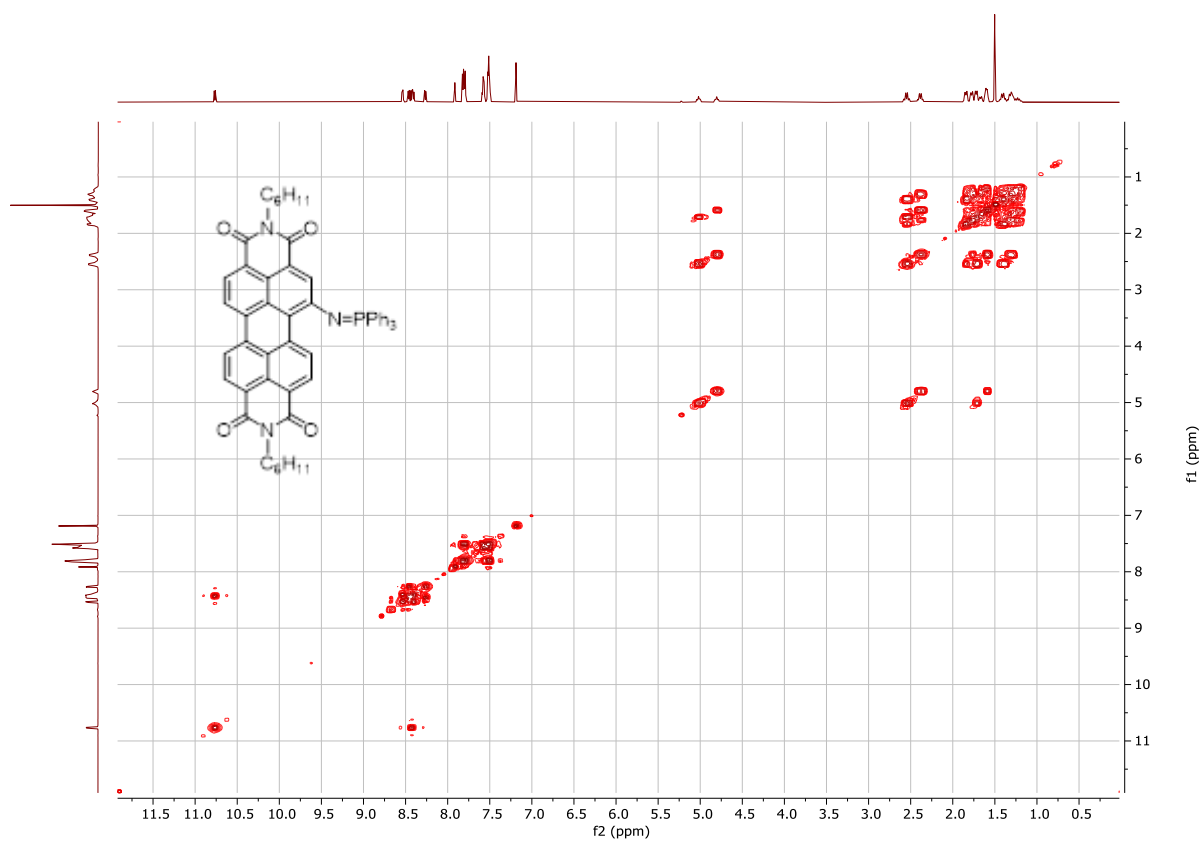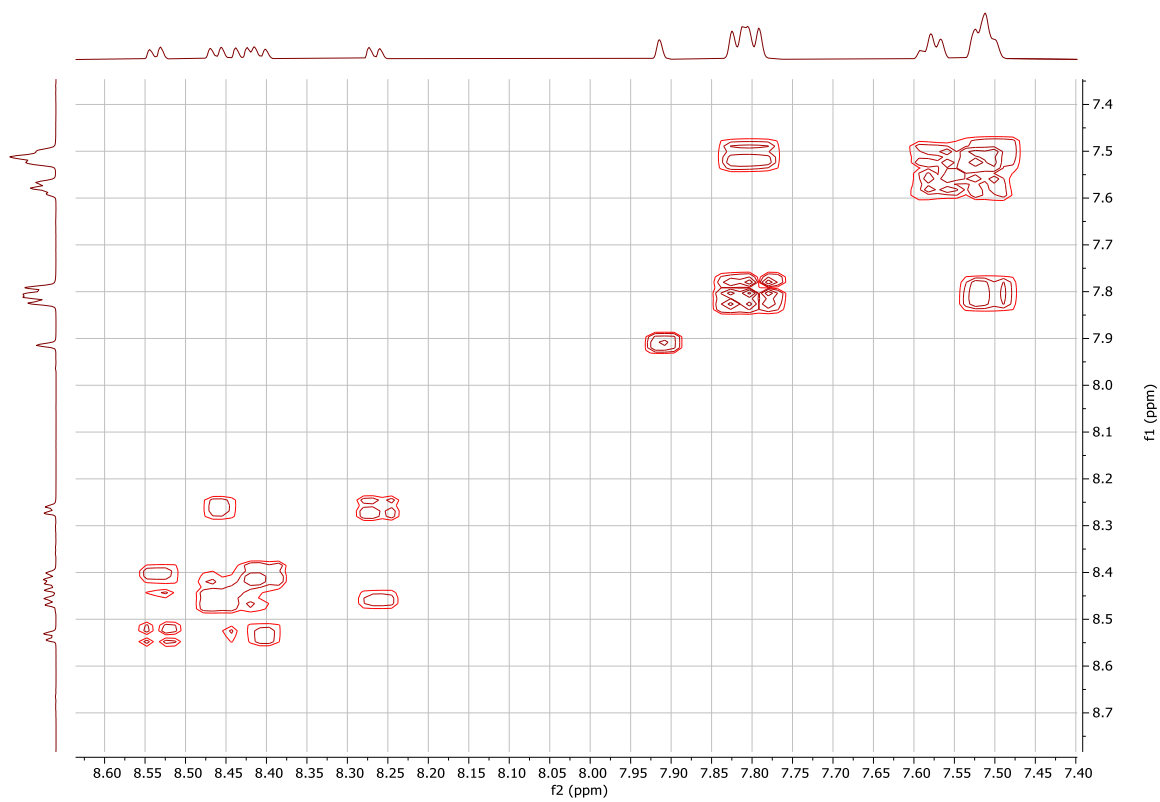

Figure S2:  $2D^1H$  NMR (500 MHz,  $CDCl_3$ , 293 K) of compound 4 and enlargement of the aromatic region.

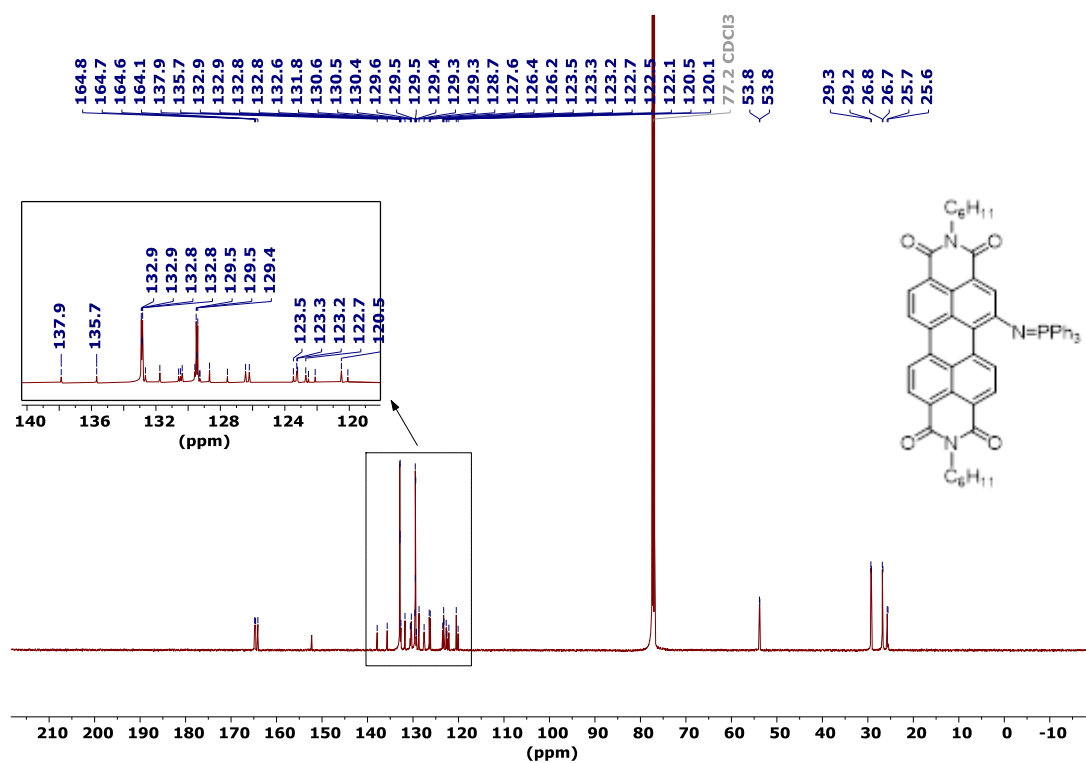

Figure S3: <sup>13</sup>C NMR (125 MHz, CDCl<sub>3</sub>, 293 K) of compound 4.

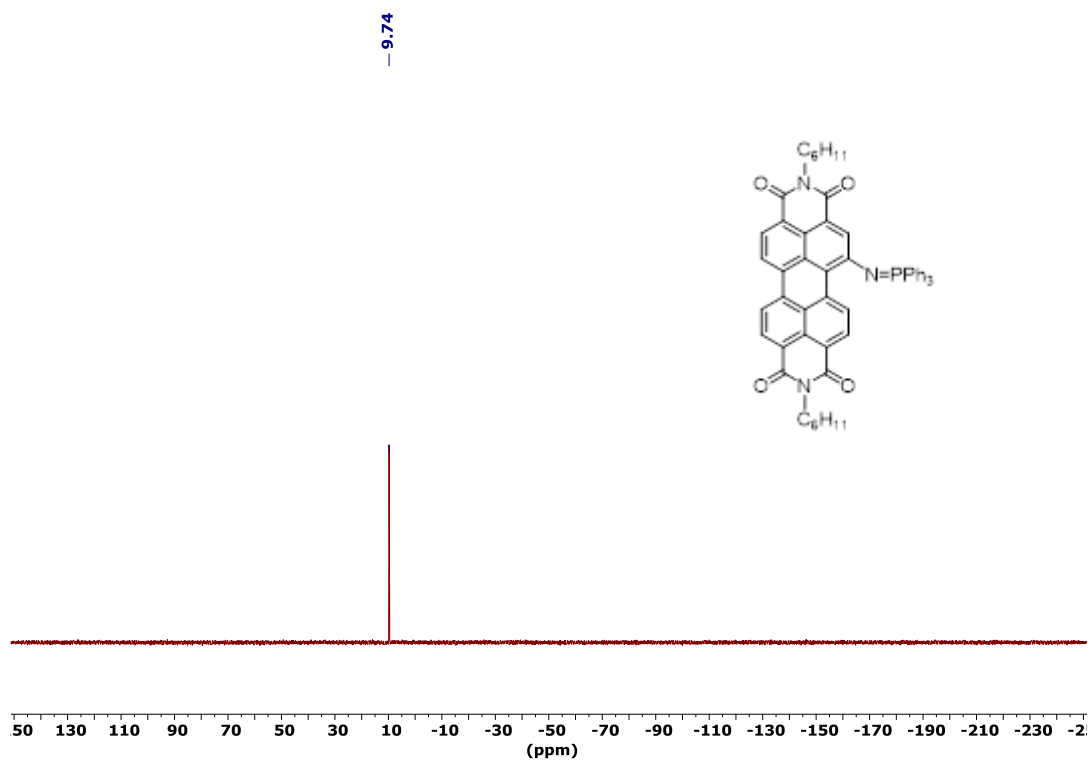

Figure S4: <sup>31</sup>P NMR (202.4 MHz, CDCl<sub>3</sub>, 293 K) of compound 4.

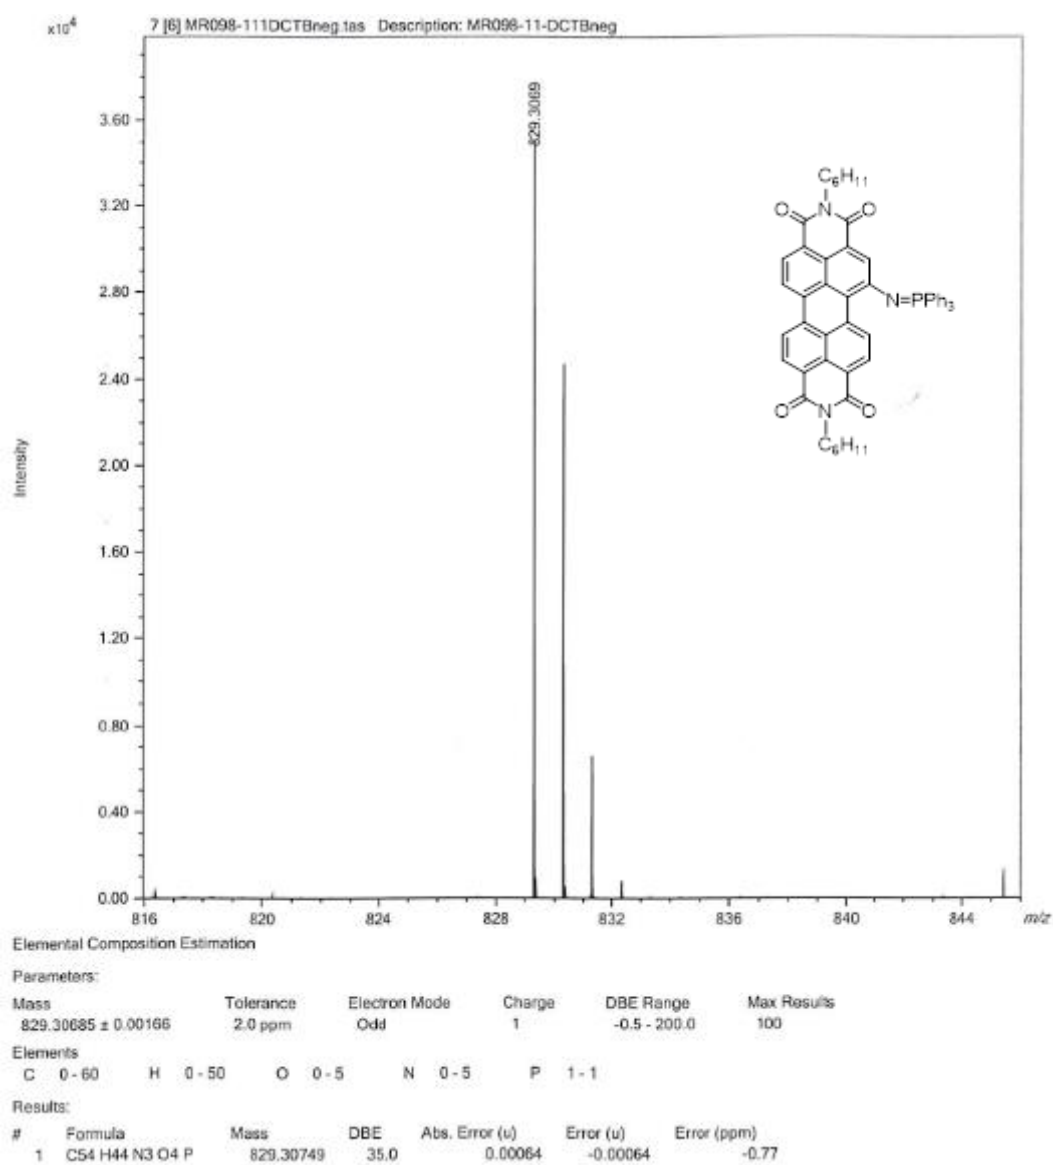

Figure S5: HR-MS (MALDI-TOF, DCTB matrix) of compound 4.

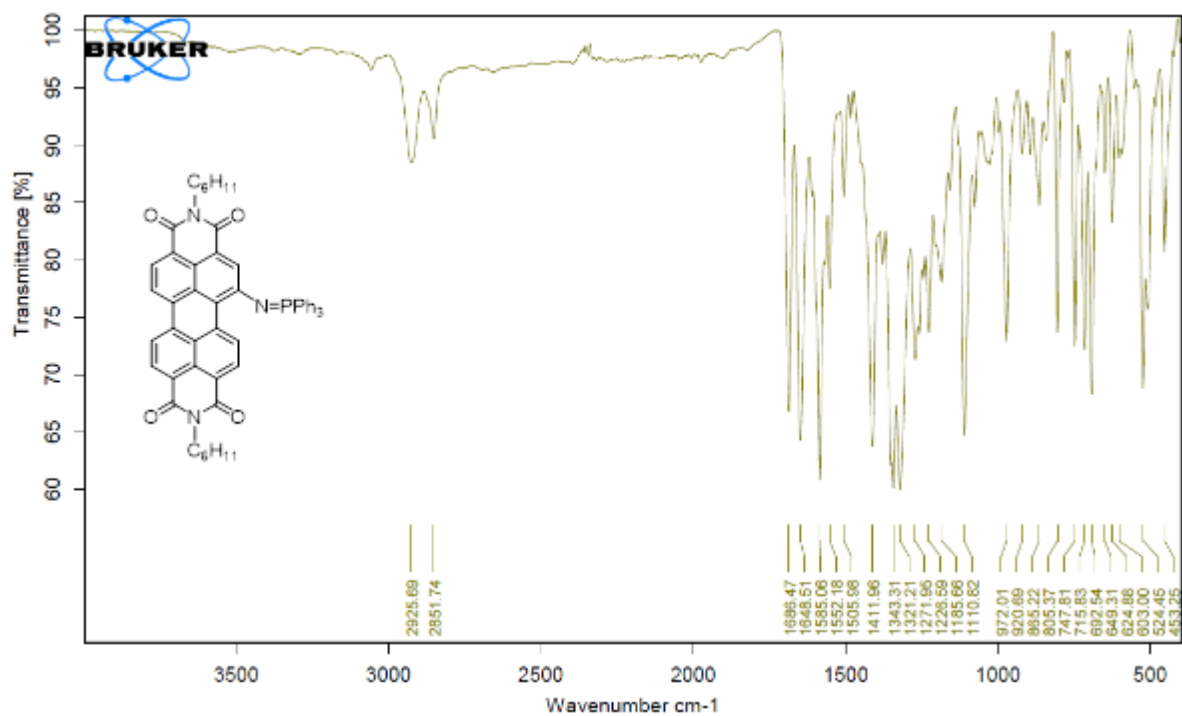

Figure S6: FT-IR spectrum of compound 4.

Compound 5 :

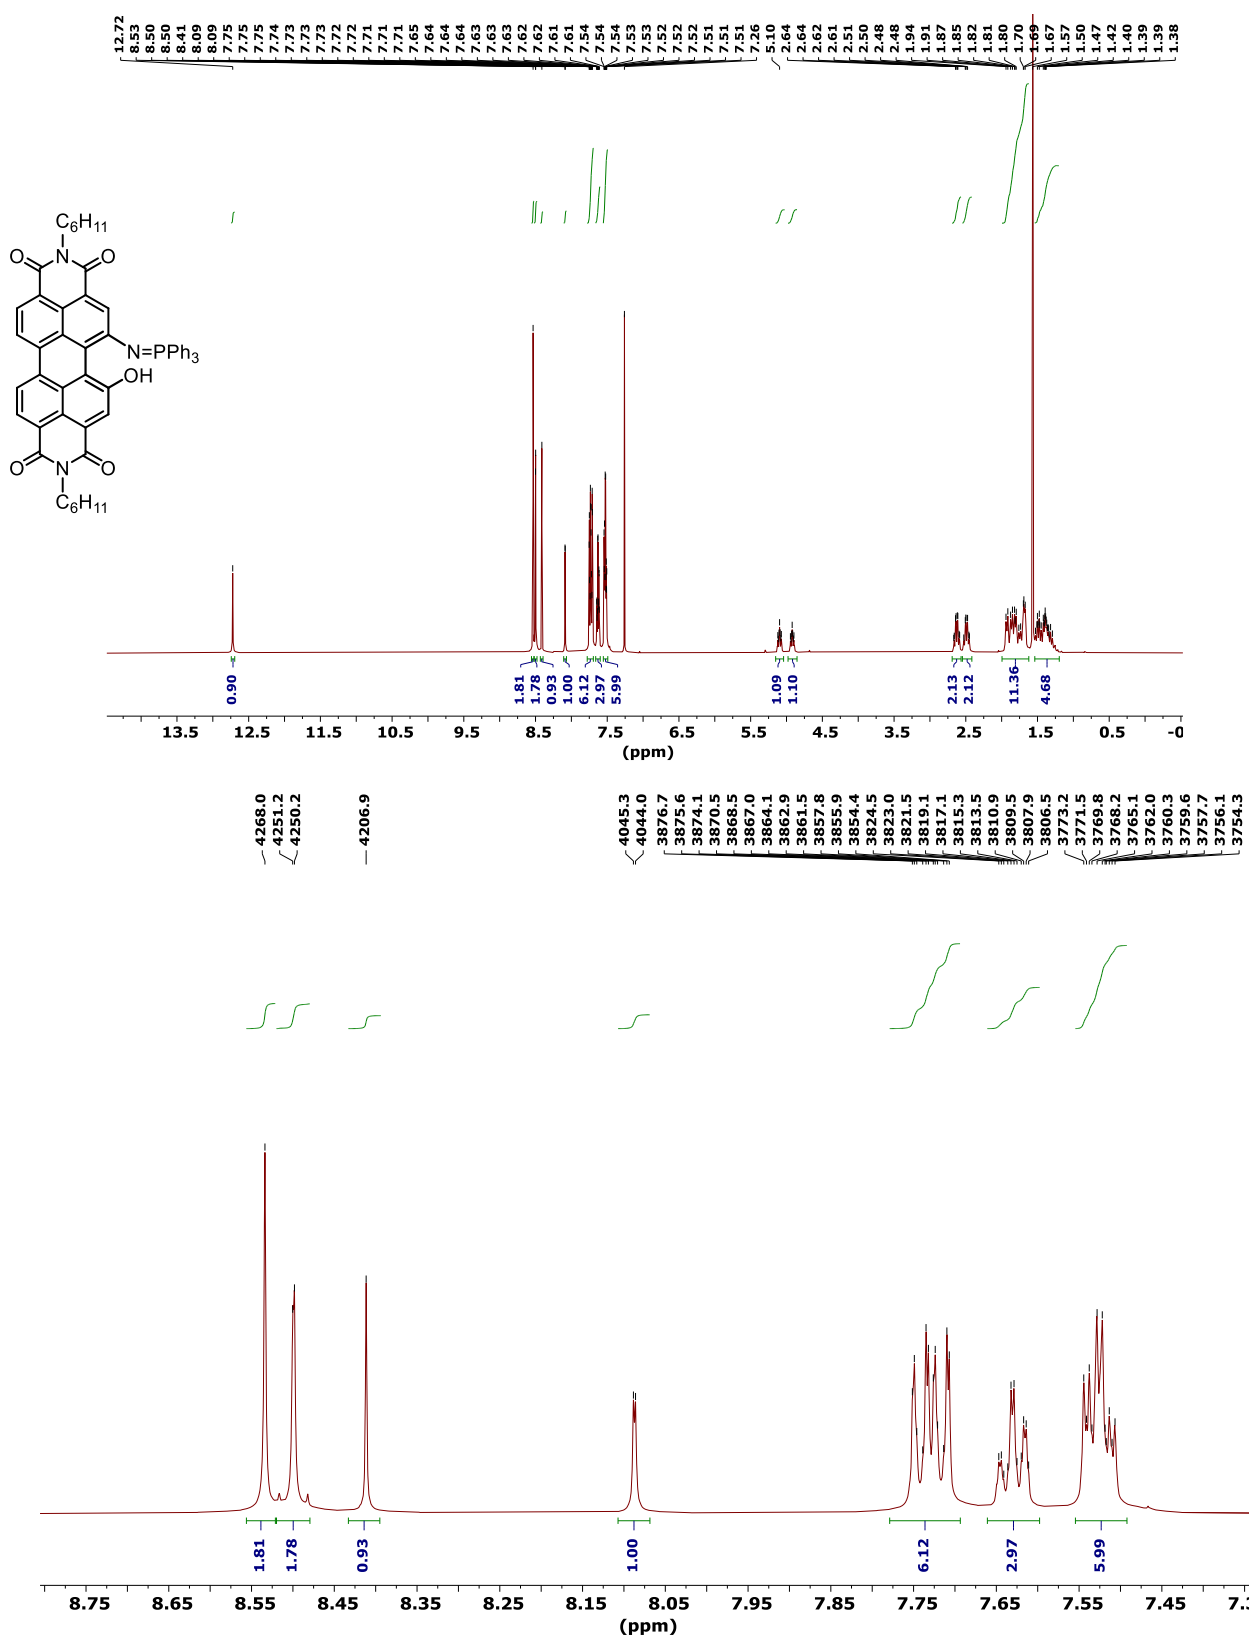

Figure S7:  $^1\text{H}$  NMR (500 MHz,  $\text{CDCl}_3$ , 293 K) of compound 5 and enlargement of the aromatic region.

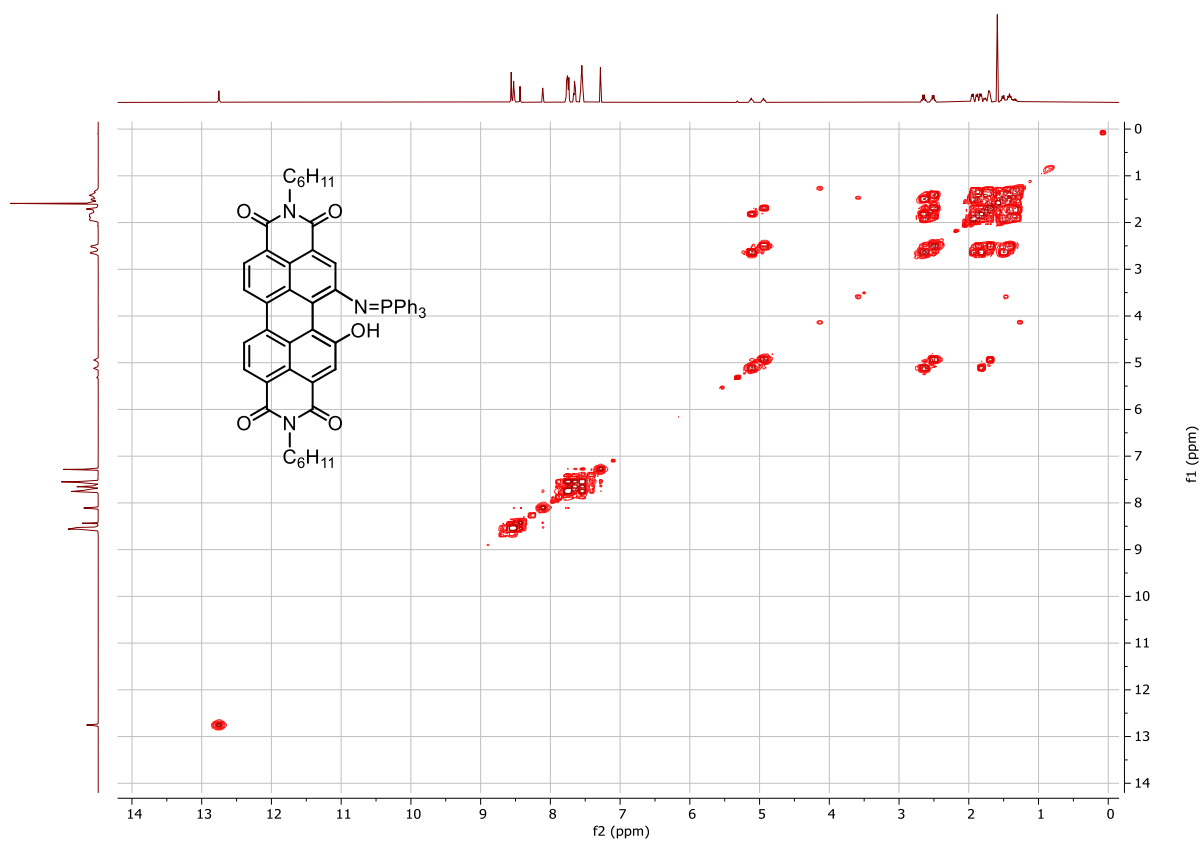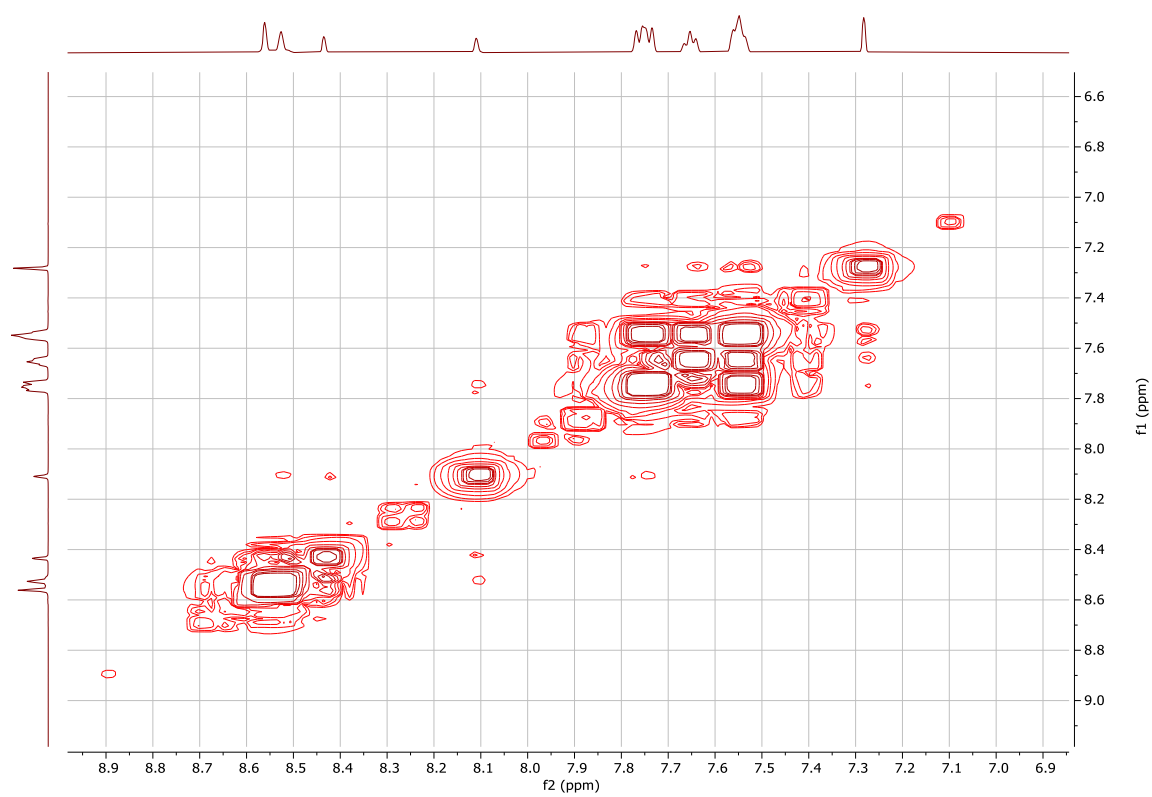

Figure S8: 2D  $^1\text{H}$  NMR (500 MHz,  $\text{CDCl}_3$ , 293 K) of compound 5 and enlargement of the aromatic region.



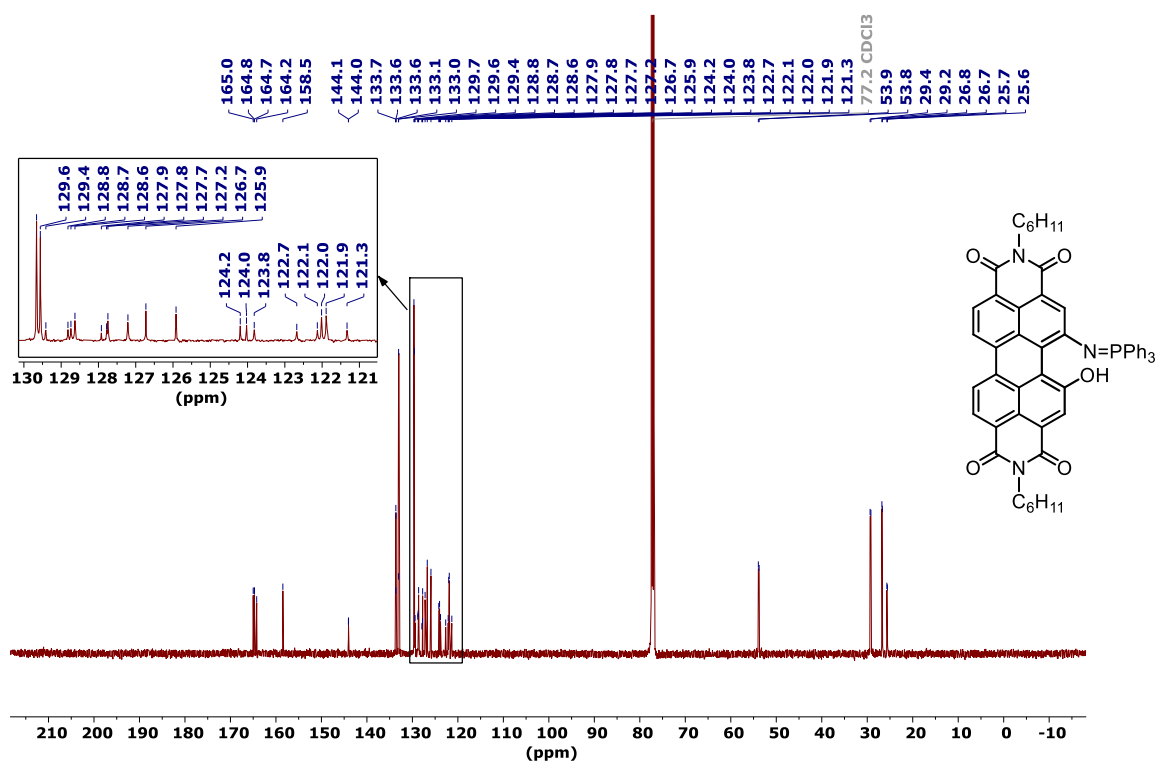

Figure S9: <sup>13</sup>C NMR (125 MHz, CDCl<sub>3</sub>, 293 K) of compound 5.

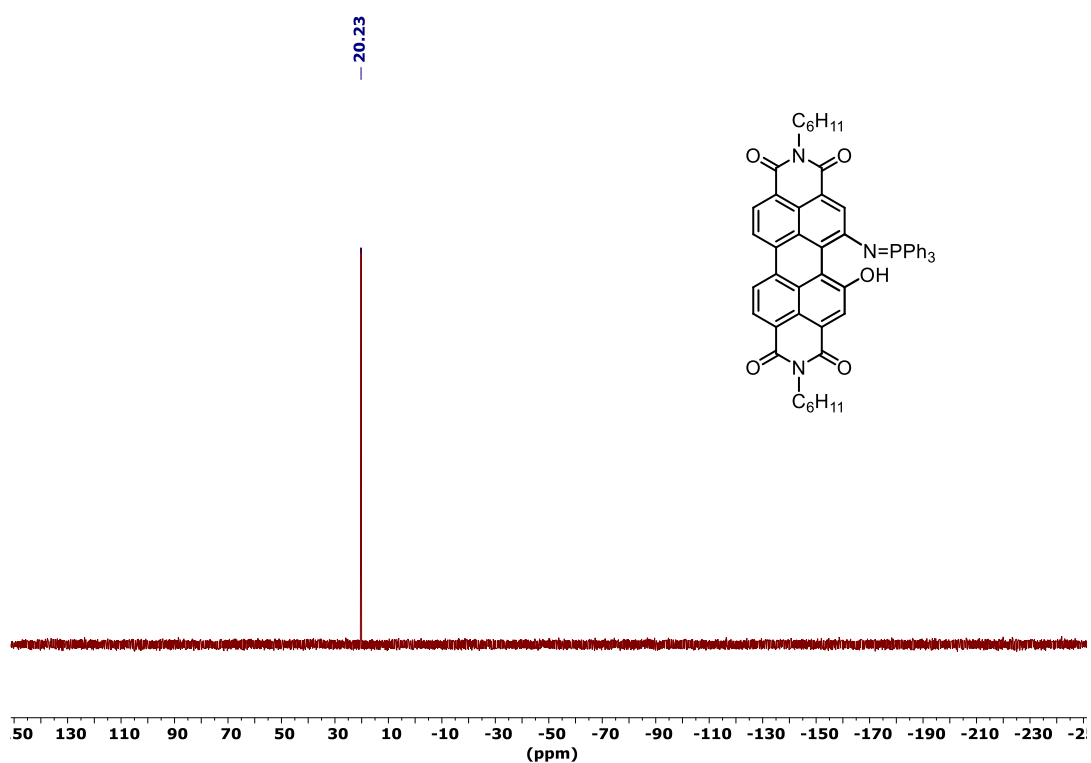

Figure S10: <sup>31</sup>P NMR (202.4 MHz, CDCl<sub>3</sub>, 293 K) of compound 5.

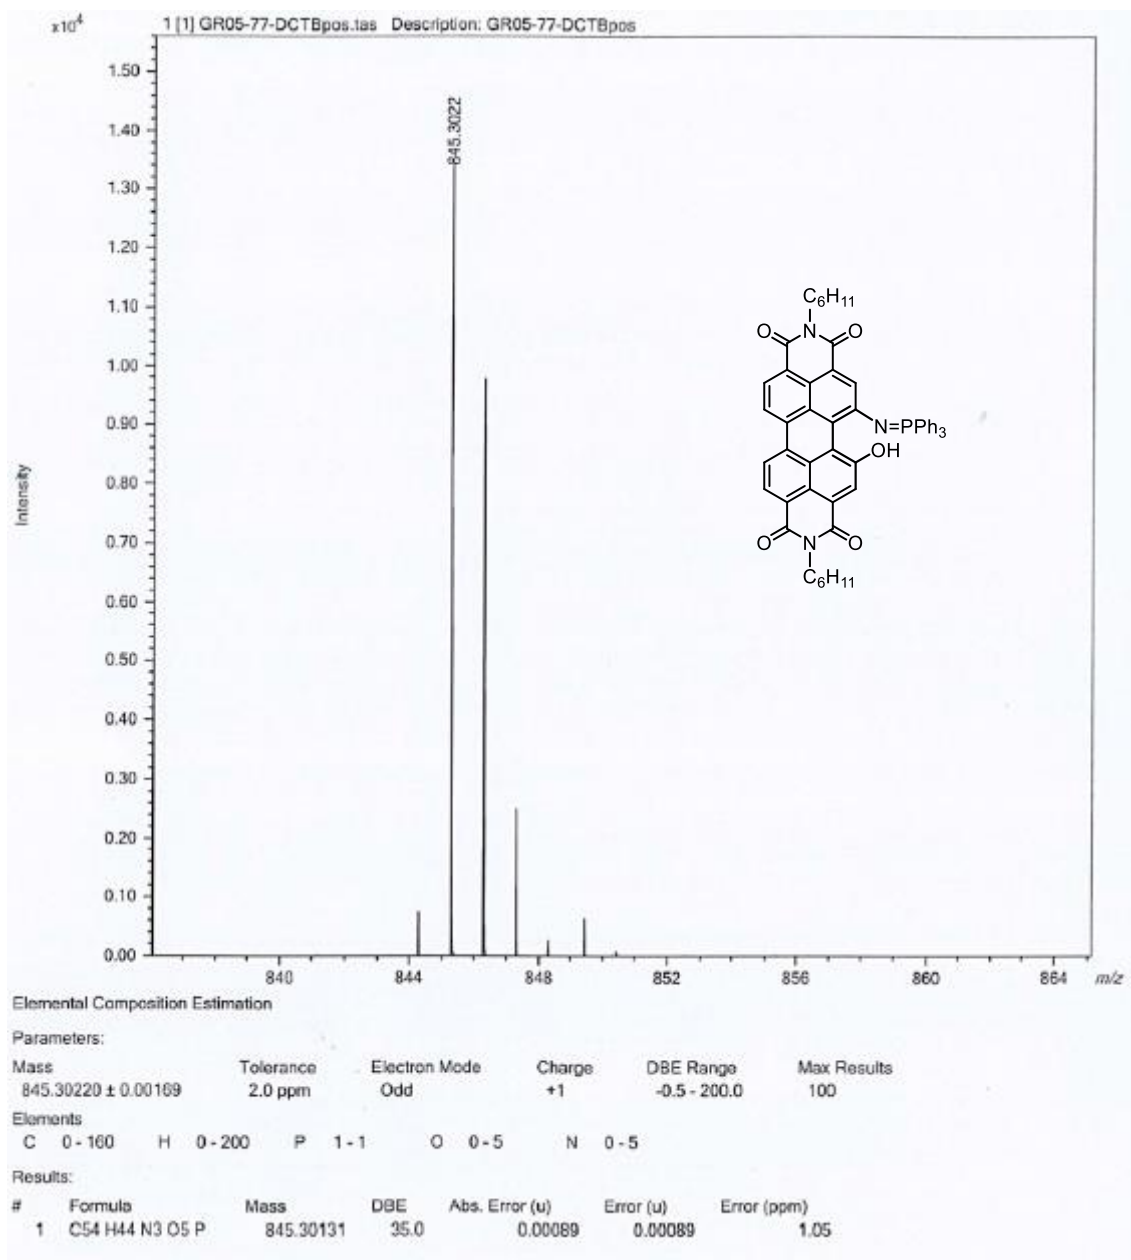

Figure S11: HR-MS (MALDI, DCTB matrix) of compound 5.

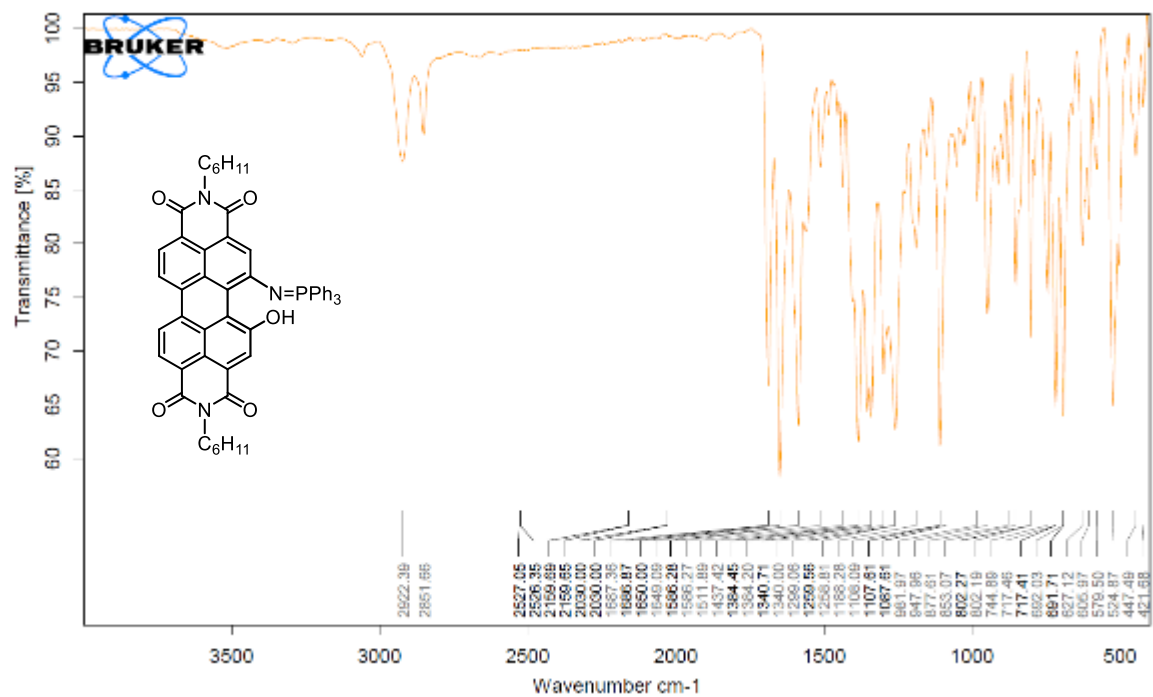

Figure S12: FT-IR spectrum of compound 5.

**Compound 6 :**

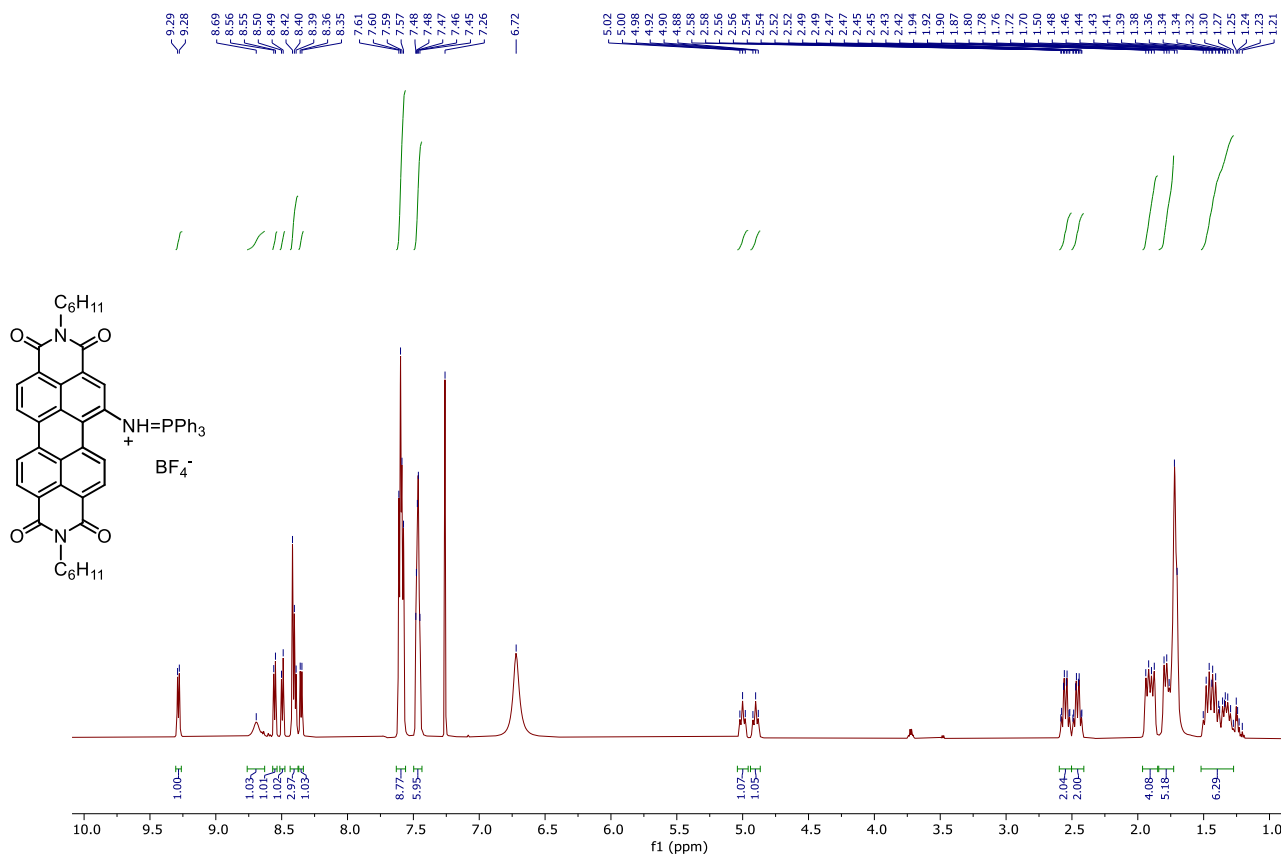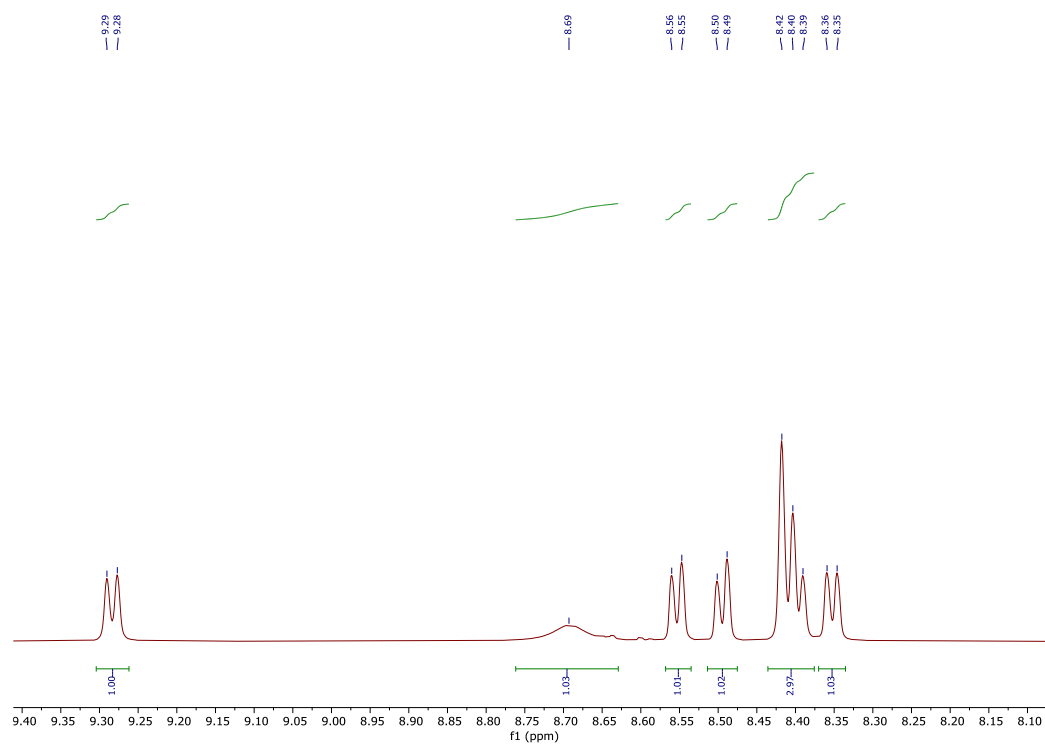

Figure S13:  $^1\text{H}$  NMR (500 MHz,  $\text{CDCl}_3$ , 293 K) of compound 6.

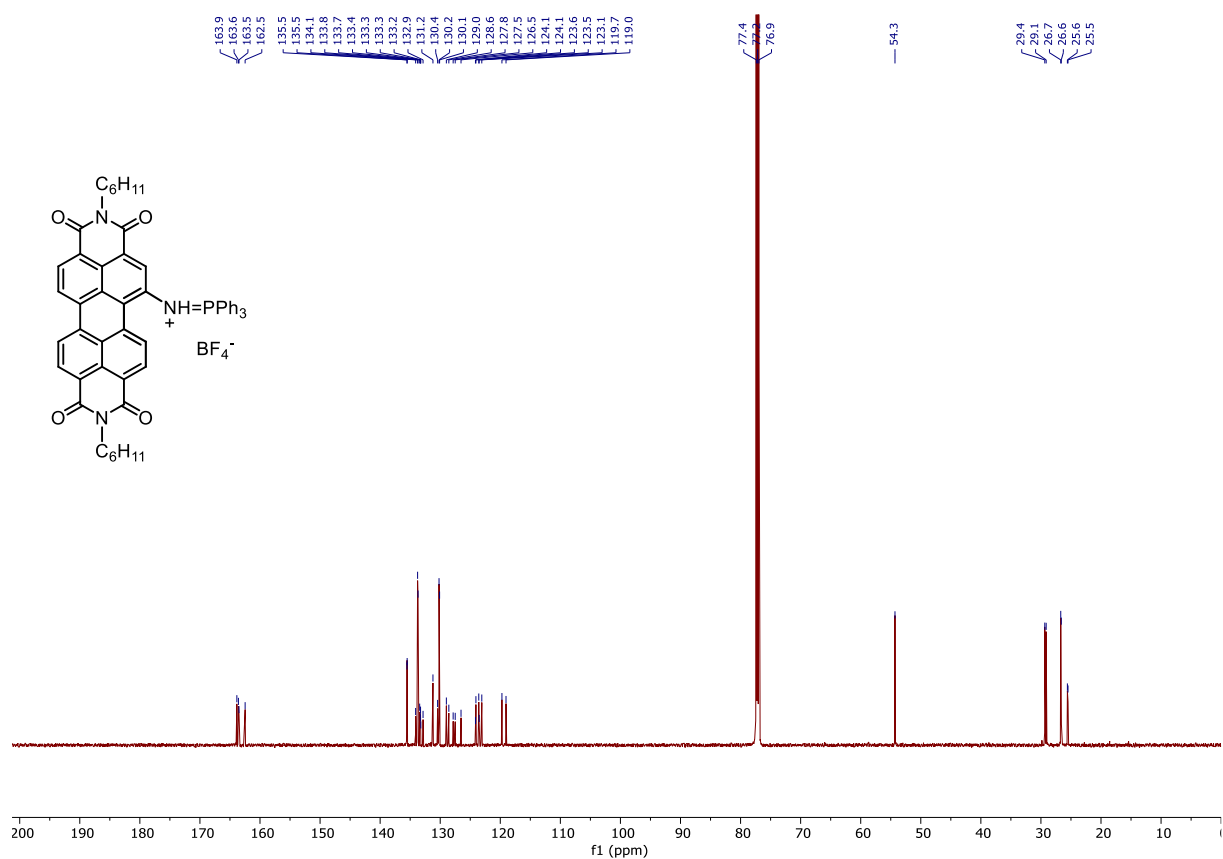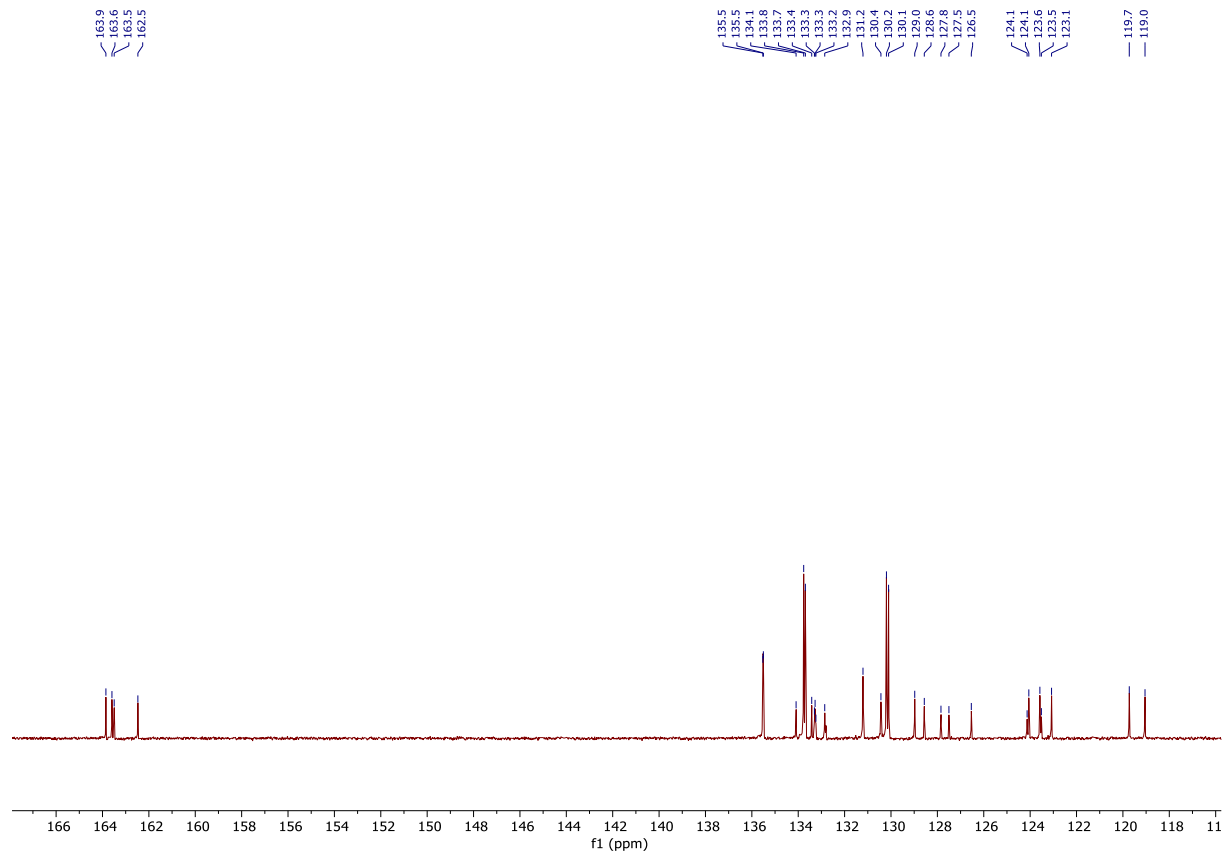

Figure S14:  $^{13}\text{C}$  NMR (125 MHz,  $\text{CDCl}_3$ , 293 K) of compound 6.

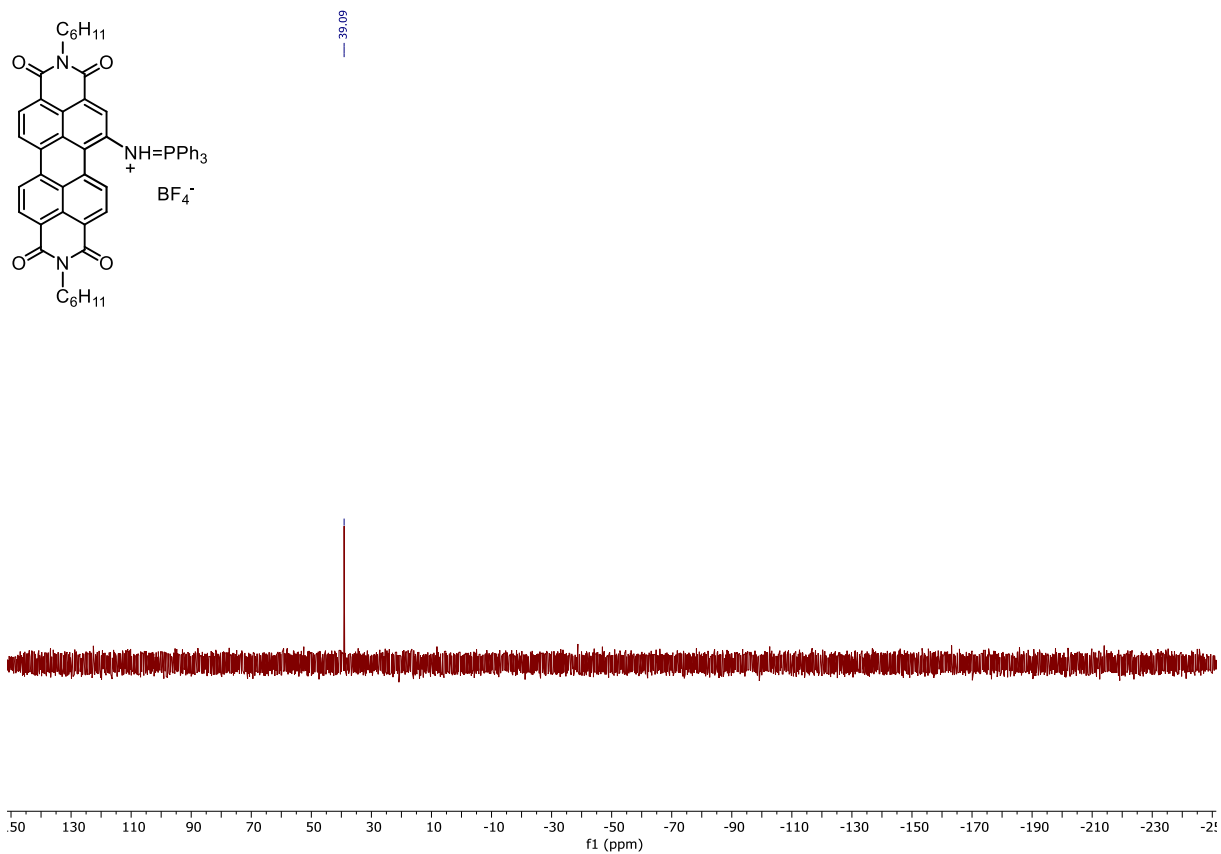

Figure S15: <sup>31</sup>P NMR (202.4 MHz, CDCl<sub>3</sub>, 293 K) of compound 6.

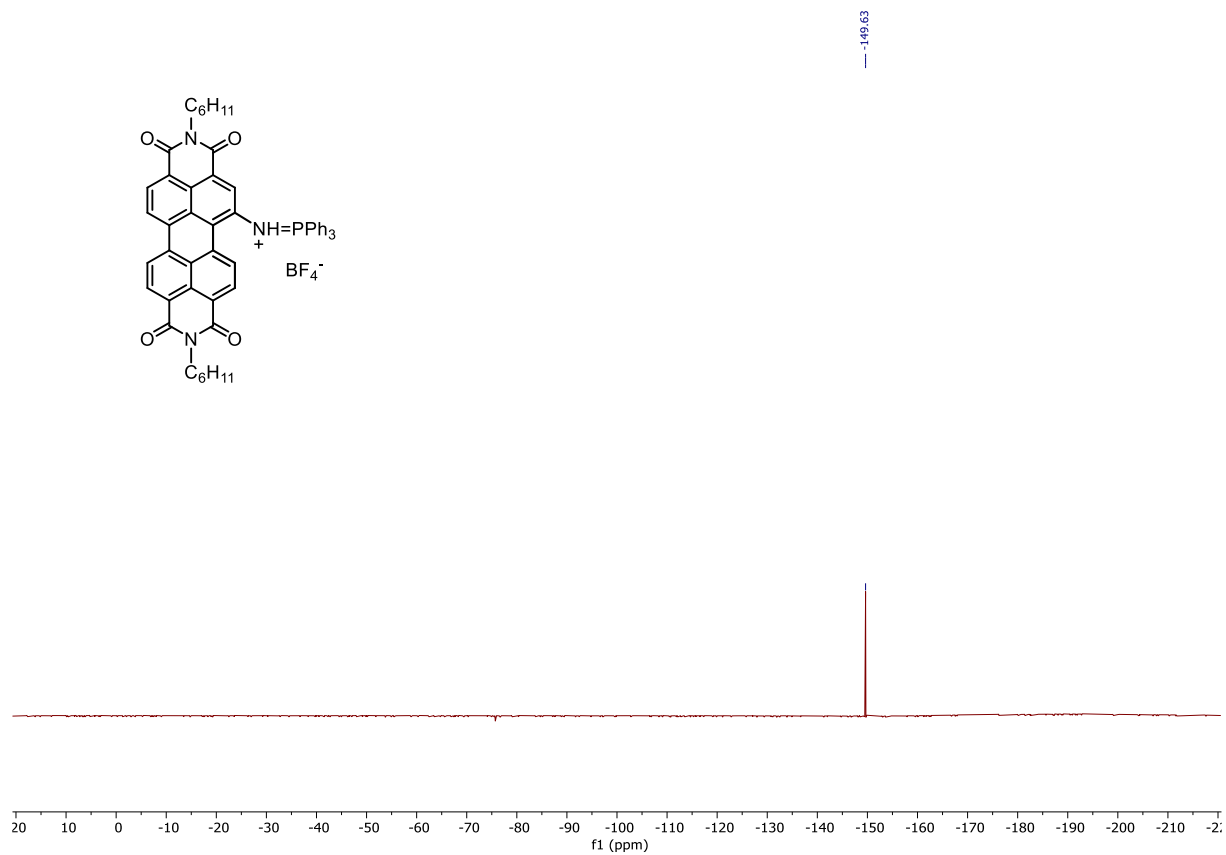

Figure S16: <sup>19</sup>F NMR (283 MHz, CDCl<sub>3</sub>, 293 K) of compound 6.

**Compound 7 :**

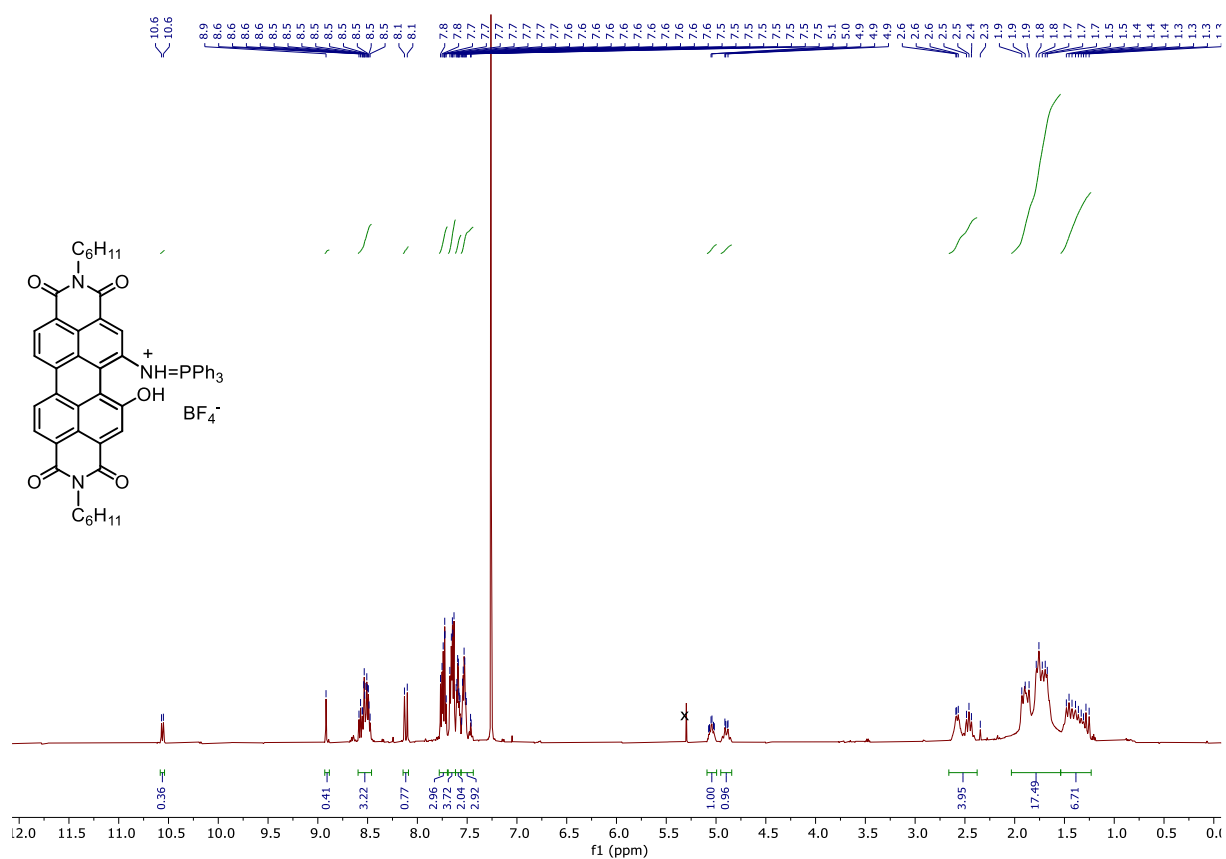

Figure S17:  $^1\text{H NMR}$  (500 MHz,  $\text{CDCl}_3$ , 293 K) of compound 7.

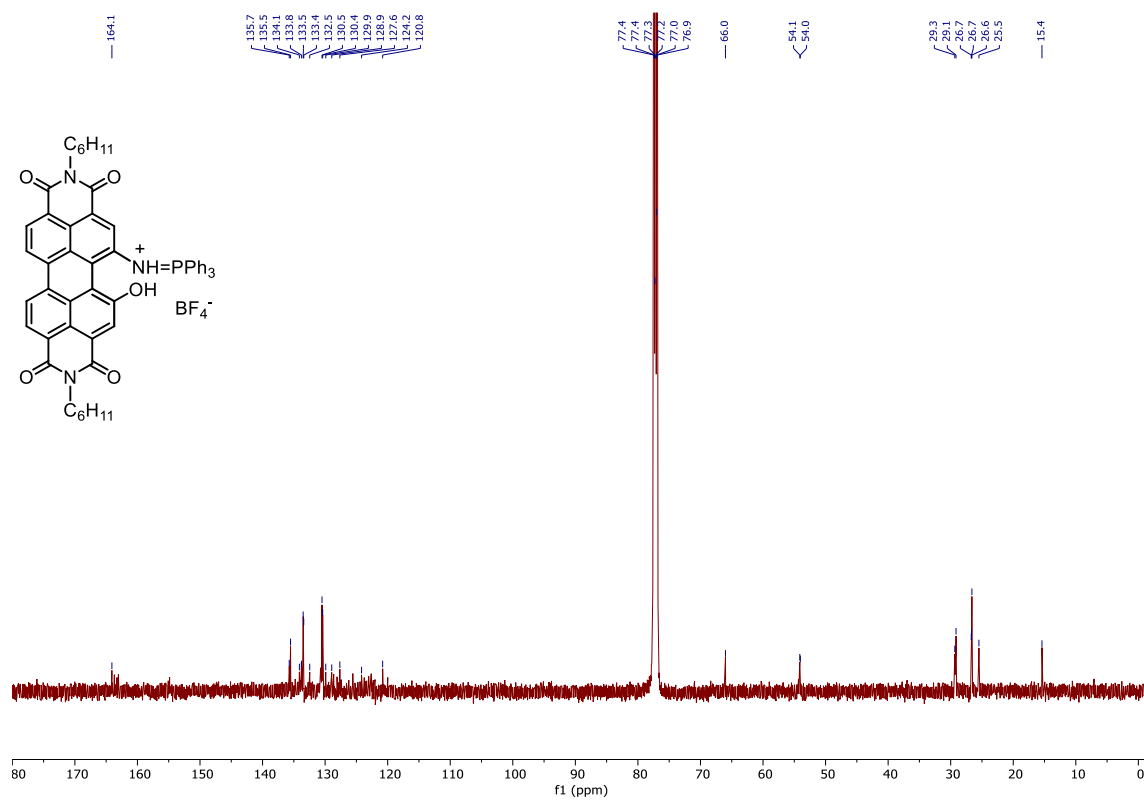

Figure S18:  $^{13}\text{C NMR}$  (125 MHz,  $\text{CDCl}_3$ , 293 K) of compound 7, poorly soluble in  $\text{CDCl}_3$ .

— 34.06

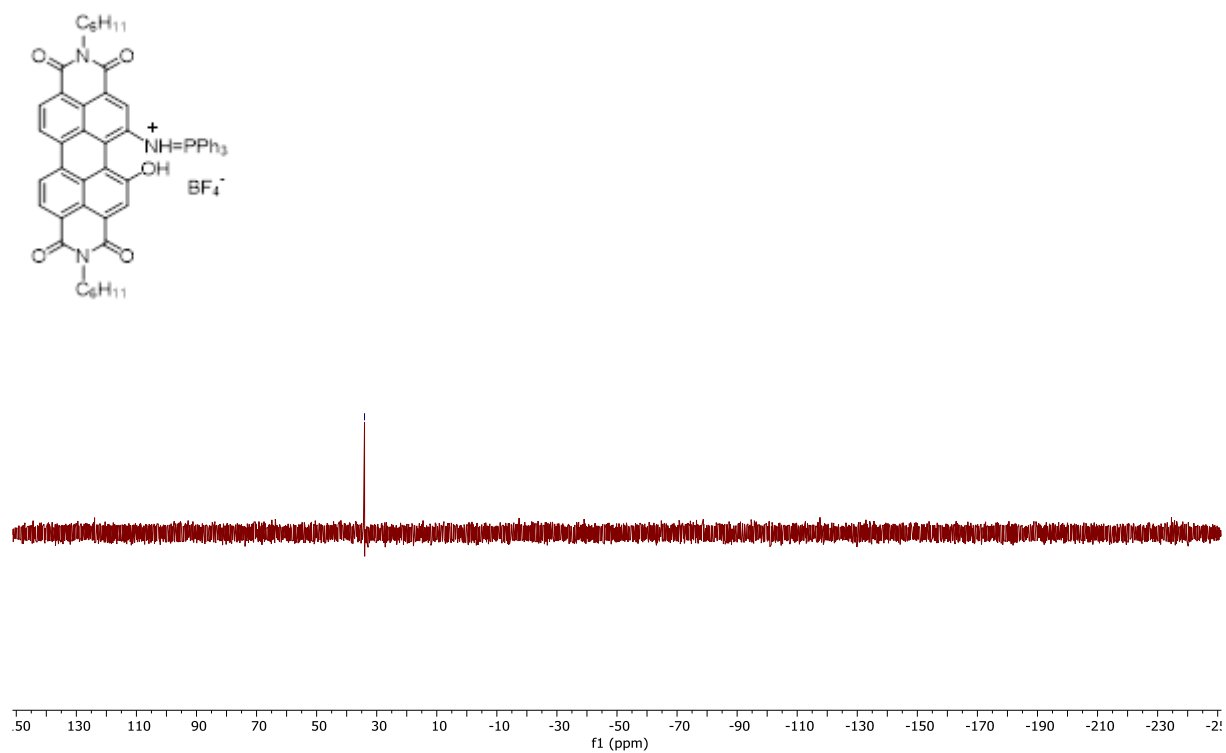

Figure S19: <sup>31</sup>P NMR (202.4 MHz, CDCl<sub>3</sub>, 293 K) of compound 7.



## 2. Absorption and fluorescence spectroscopies

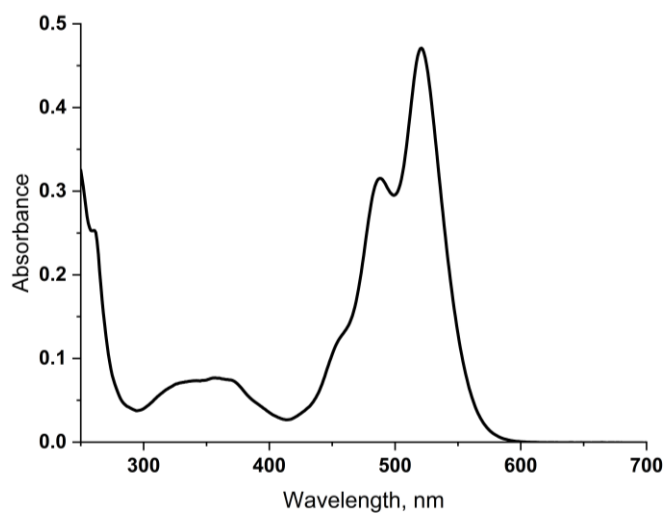

Figure S20: UV-Visible spectra of nitroPDI 1 in  $\text{CH}_2\text{Cl}_2$  ( $10^{-5}$  M).

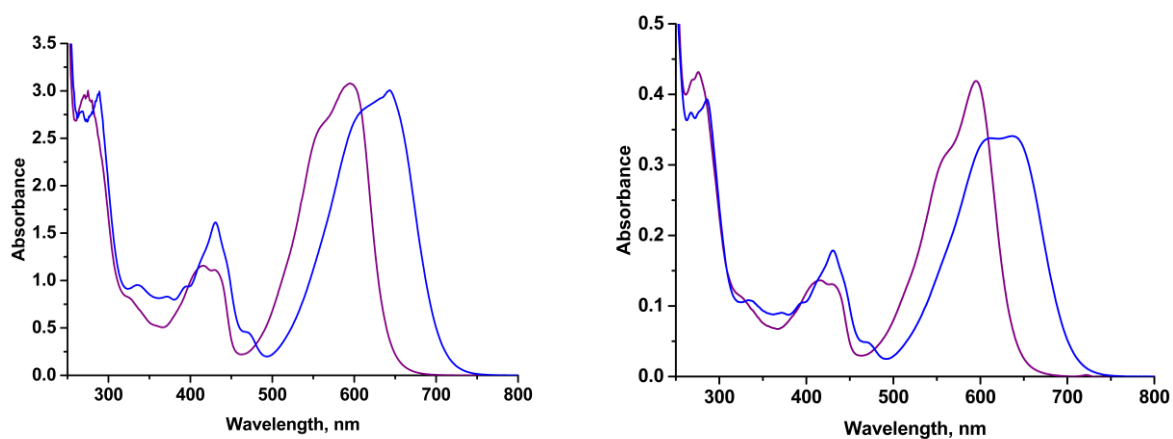

Figure S21: UV-Visible spectra of compound 4 (blue) and compound 5 (violet) in  $\text{CH}_2\text{Cl}_2$  at  $10^{-4}$  M (left) and  $10^{-5}$  M (right). Some aggregation can be noticed for compound 4 at higher concentration.

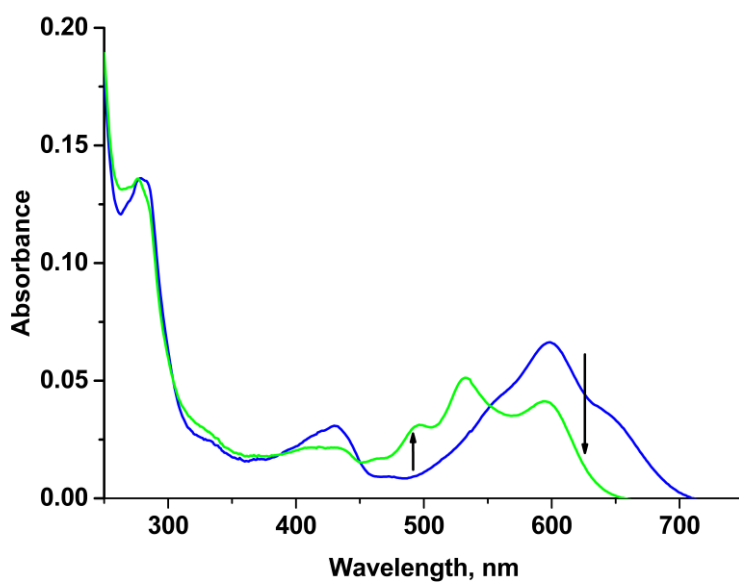

Figure S22: Photostability study of compound 4 at  $10^{-6}$  M in  $\text{CH}_2\text{Cl}_2$  UV-Visible spectra at  $t = 0$  (blue), after 3 h of irradiation with the LED lamp (green).

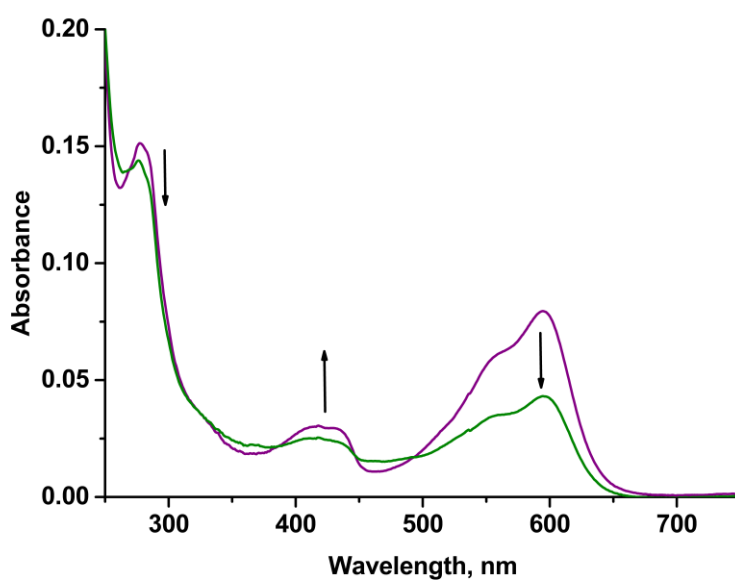

Figure S23: Photostability study of compound 5 at  $10^{-6}$  M in  $\text{CH}_2\text{Cl}_2$  UV-Visible spectra at  $t = 0$  (violet), after 3 h of irradiation with the LED lamp (olive).

### 3. Electrochemistry

The electrochemical properties of compounds **1**, **4** and **5** were investigated in glove-box in anhydrous dichloromethane at a scan rate of  $100 \text{ mV s}^{-1}$  using  $0.1 \text{ M nBu}_4\text{NPF}_6$  in  $\text{CH}_2\text{Cl}_2$  as supporting electrolyte. Pt electrodes were used as both the working and counter electrodes, and with Ag/AgCl as the pseudoreference electrode. A ferrocene/ferrocenium ( $\text{Fc}/\text{Fc}^+$ ) redox couple was used as internal standard and was assigned an absolute energy level of  $-4.8 \text{ eV}$  vs vacuum.

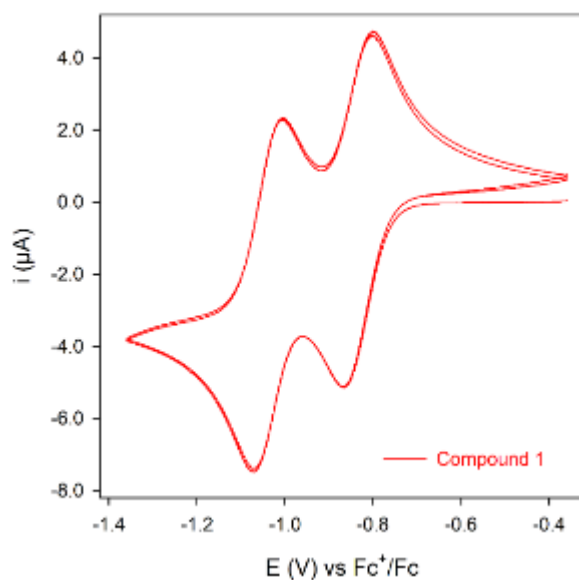

Figure S24: Cyclic voltammogram of compound **1** ( $C = 10^{-3} \text{ M}$  in  $\text{CH}_2\text{Cl}_2$ ).

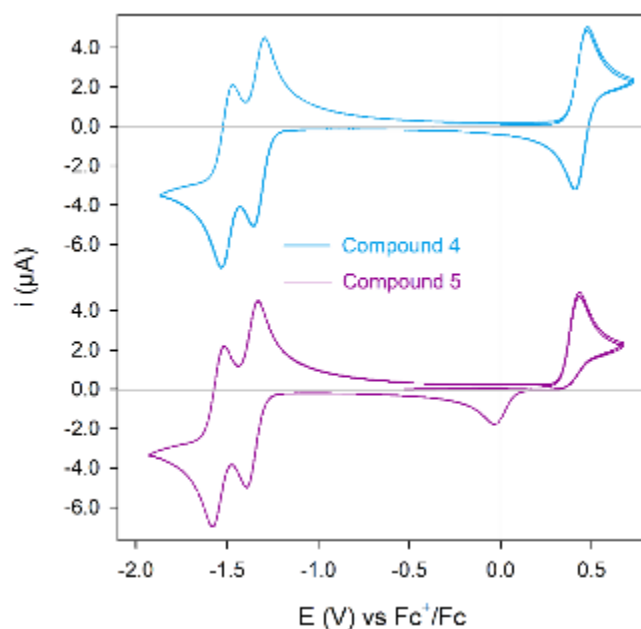

Figure S25: Cyclic voltammograms of compounds **4** and **5** ( $C = 10^{-3} \text{ M}$  in  $\text{CH}_2\text{Cl}_2$ ).

#### 4. Spectroelectrochemistry

##### **Iminophosphorane-PDI 4:**

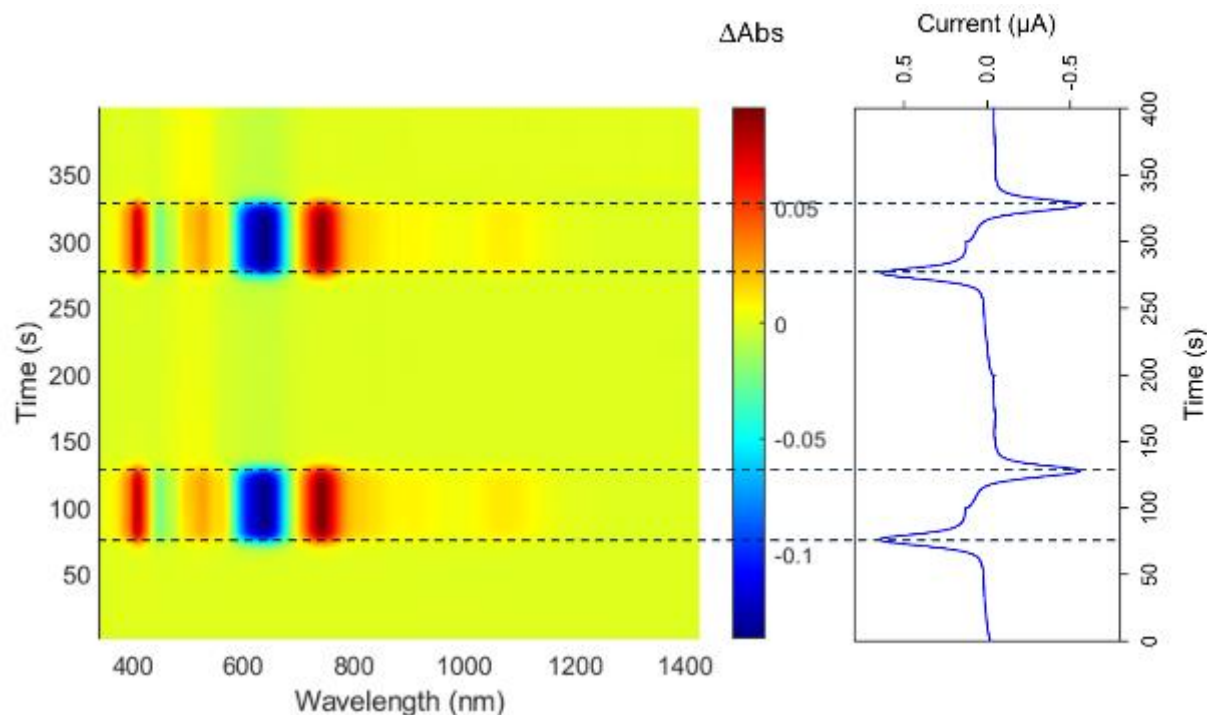

Figure S26: Absorption variation recorded by real-time absorption spectroelectrochemistry of iminophosphorane-PDI 4 under thin-layer conditions in 1 mM  $\text{CH}_2\text{Cl}_2$  with  $n\text{-Bu}_4\text{NPF}_6$  (0.1 M in  $\text{CH}_2\text{Cl}_2$ ), using Pt as the working electrode.

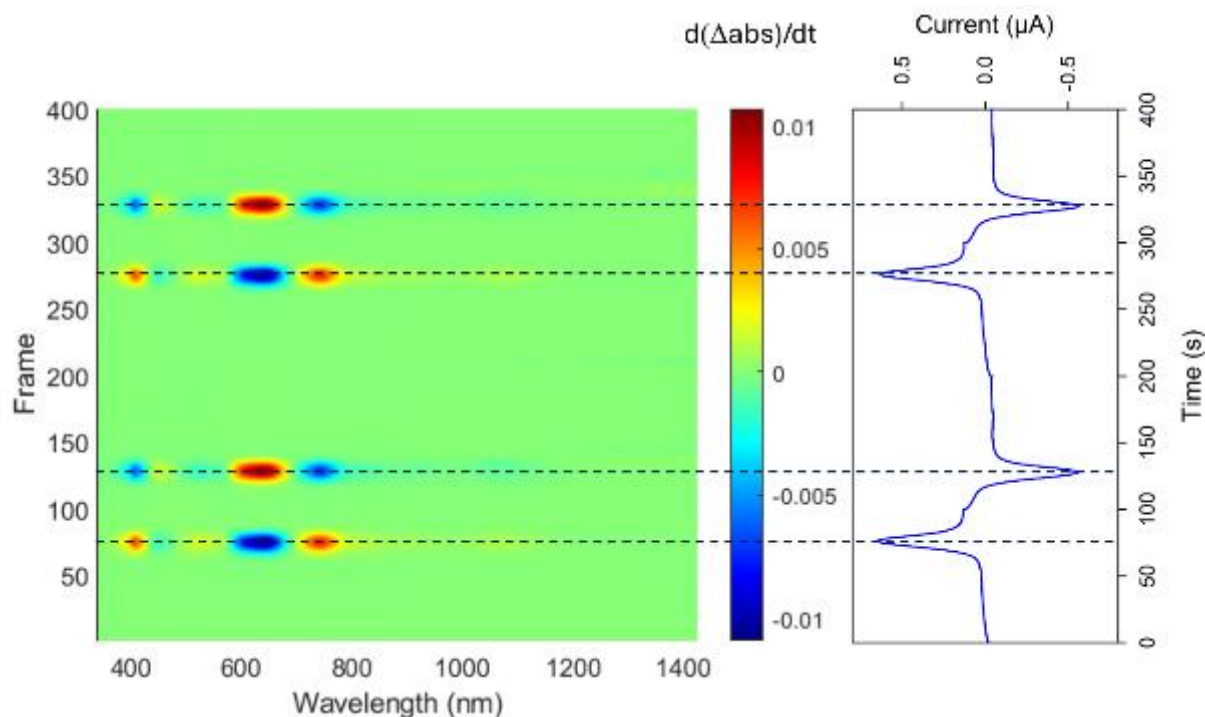

Figure S27: Absorption variation derivative recorded by real-time absorption spectroelectrochemistry of iminophosphorane-PDI 4 under thin-layer conditions in 1 mM  $\text{CH}_2\text{Cl}_2$  with  $n\text{-Bu}_4\text{NPF}_6$  (0.1 M in  $\text{CH}_2\text{Cl}_2$ ), using Pt as the working electrode.

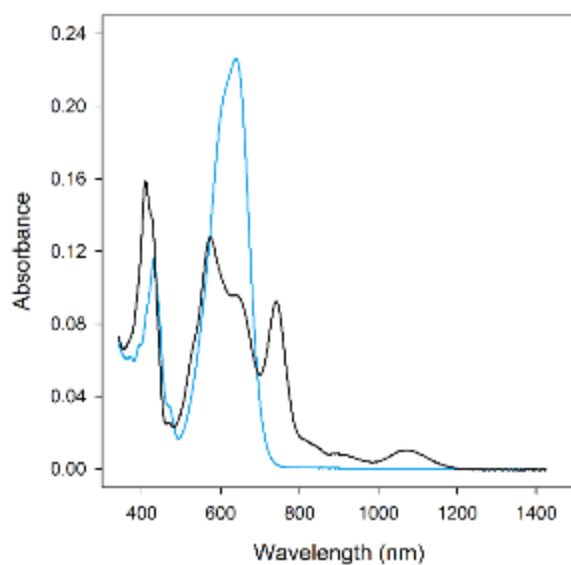

Figure S28: Absorption spectra of iminophosphorane-PDI 4 in neutral state (blue) and in oxidized state (black).

**Iminophosphorane-PDI 5:**

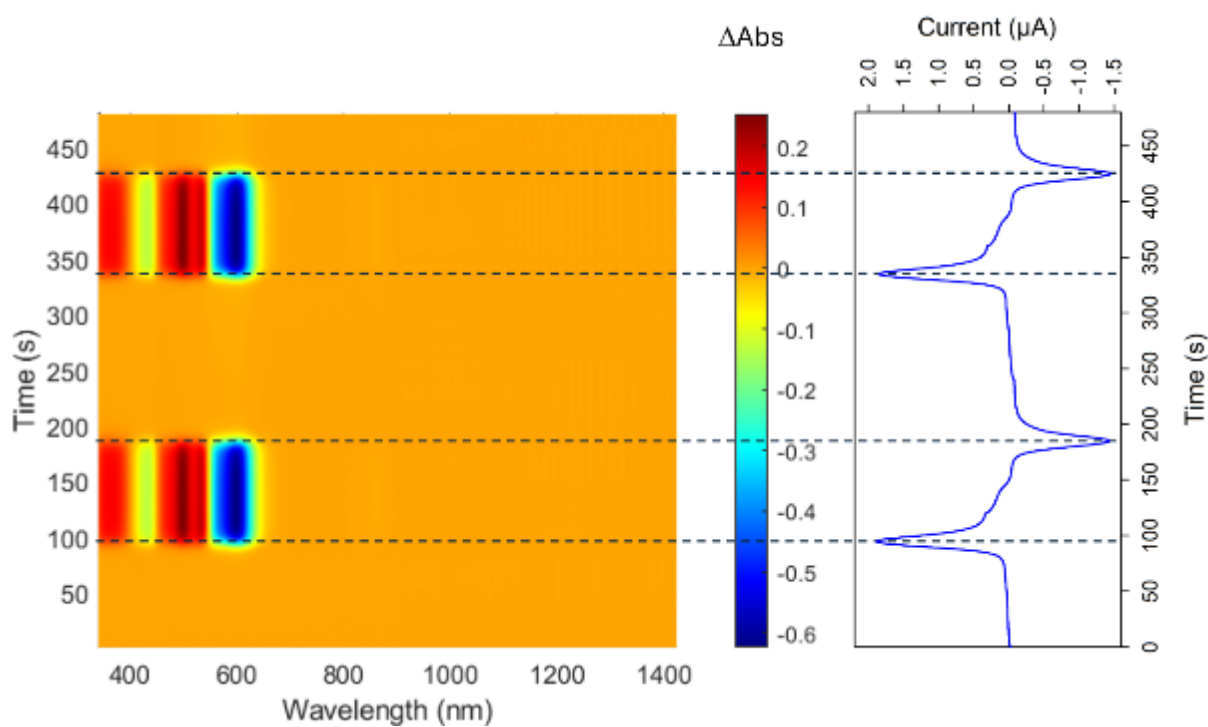

Figure S29: Absorption variation recorded by real-time absorption spectroelectrochemistry of iminophosphorane-PDI 5 under thin-layer conditions in 1 mM  $\text{CH}_2\text{Cl}_2$  with  $n\text{-Bu}_4\text{NPF}_6$  (0.1 M in  $\text{CH}_2\text{Cl}_2$ ), using Pt as the working electrode.

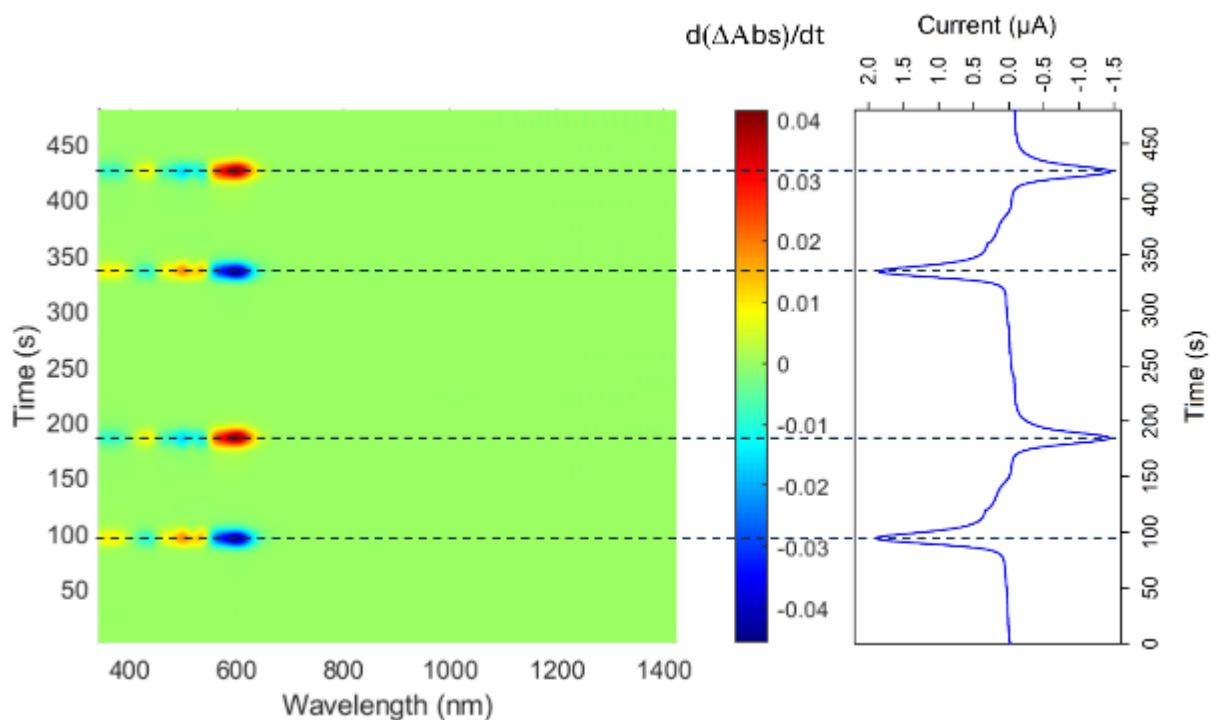

Figure S30: Absorption variation derivative recorded by real-time absorption spectroelectrochemistry of iminophosphorane-PDI 5 under thin-layer conditions in 1 mM  $\text{CH}_2\text{Cl}_2$  with  $n\text{-Bu}_4\text{NPF}_6$  (0.1 M in  $\text{CH}_2\text{Cl}_2$ ), using Pt as the working electrode.

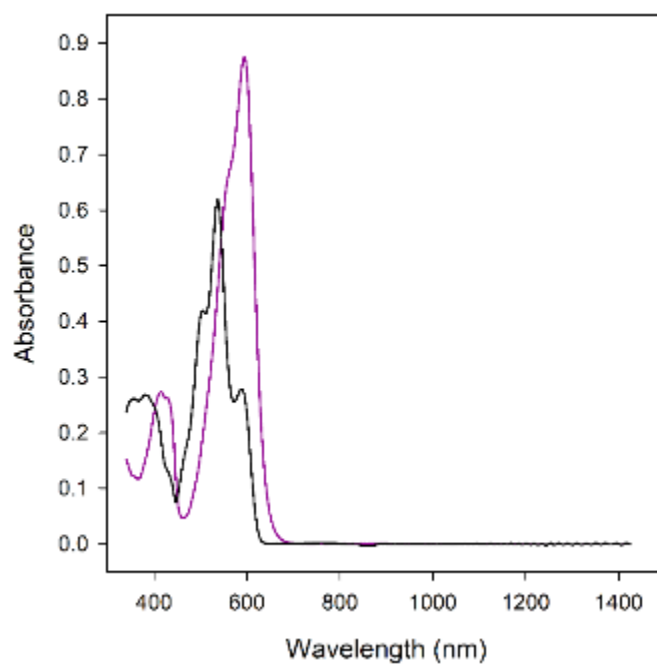

Figure S31: Absorption spectra of iminophosphorane-PDI 5 in neutral state (purple) and in oxidized state (black).

## 5. Thermogravimetric Analysis

The samples (weight 4.0 mg) were heated with a rate of 10 °C/min under N<sub>2</sub>. The thermal decomposition temperature (T<sub>d</sub>) was measured at 5% mass loss of the samples.

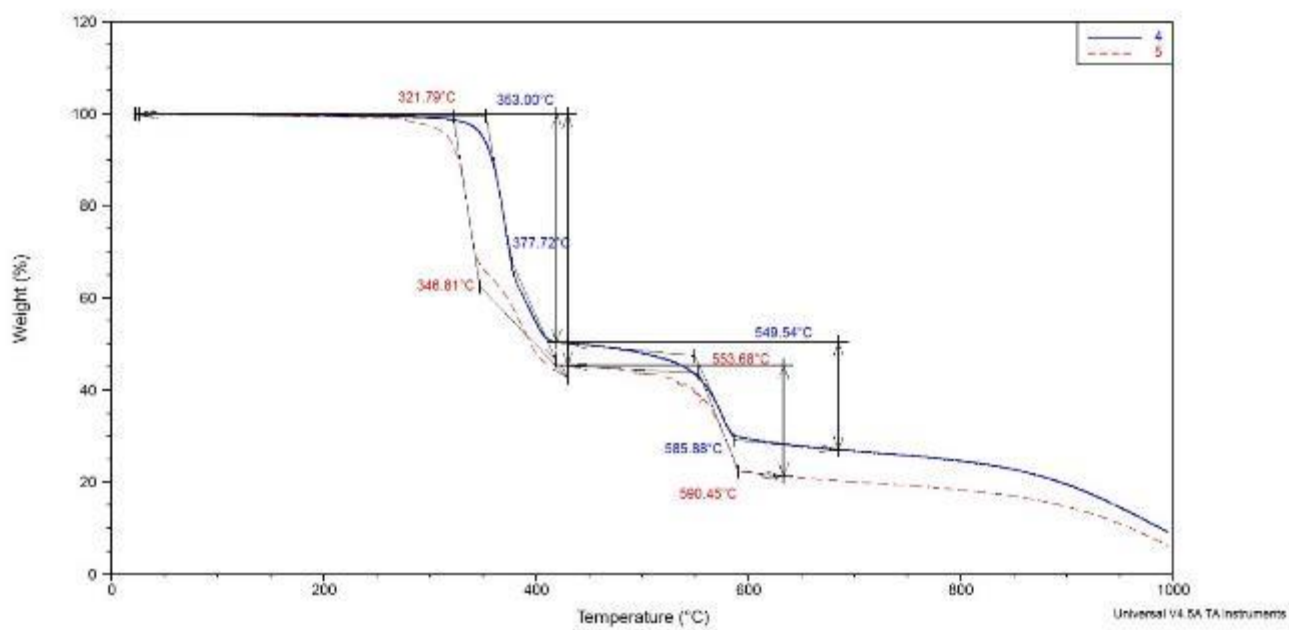

Figure S32: Thermogravimetric spectra of compounds 4 (blue) and 5 (red).

## 6. pH sensing experiments

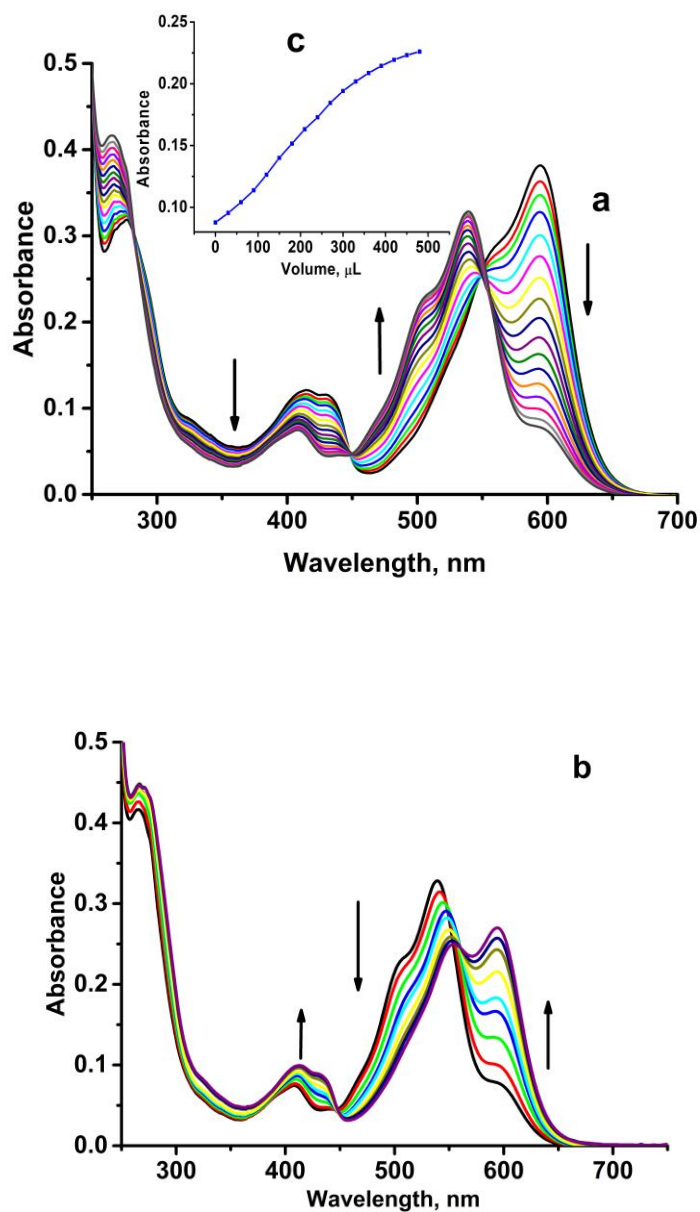

Figure S33: Iminophosphorane PDI 5 at  $10^{-5}$  M in  $CH_2Cl_2$  during spectrophotometric titration by: **a)** a solution of  $H^+PPh_3, BF_4^-$  at  $10^{-4}$  M in  $CH_2Cl_2$ ; each addition of 30  $\mu$ L corresponds to 0.12 equivalent of acid  $H^+PPh_3, BF_4^-$ ; **b)** and subsequent addition of a solution of imidazole at  $10^{-3}$  M in  $CH_2Cl_2$ ; **c)** evolution of the absorption at 526 nm during the titration by a solution of  $H^+PPh_3, BF_4^-$  at  $10^{-4}$  M in  $CH_2Cl_2$ .



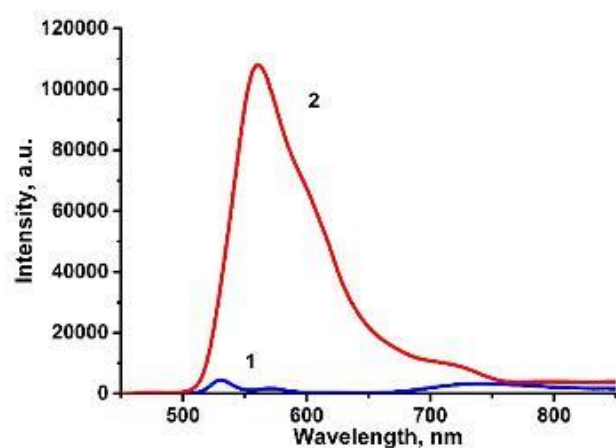

Figure S34: Fluorescence emission spectrum of compound 4 ( $C = 10^{-5} M$ ,  $\lambda_{exc} = 420 nm$ ) before -1 and after -2 spectrophotometric titration by solution of  $H^+PPh_3, BF_4^-$  in  $CH_2Cl_2$  at 298K.

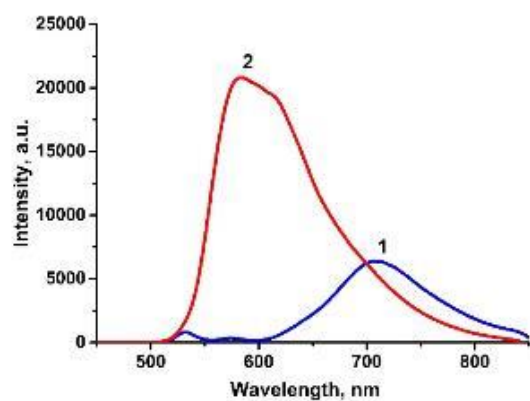

Figure S35: Fluorescence emission spectrum of compound 5 ( $C = 10^{-5} M$ ,  $\lambda_{exc} = 420 nm$ ) before -1 and after -2 spectrophotometric titration by solution of  $H^+PPh_3, BF_4^-$  in  $CH_2Cl_2$  at 298K.

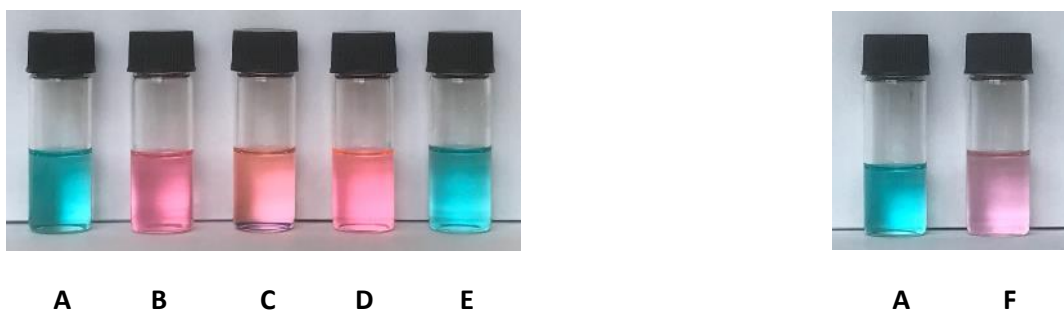

Figure S36: Photographic images of compound **4** before (A) and after addition of different acids:

**A** : Compound **4** at  $10^{-5}M$  in  $CH_2Cl_2$  as reference; **B** : after addition of  $5 \mu L$  HCl conc.; **C** : after addition of  $5 \mu L$   $H_2SO_4$  conc.; **D** : after addition of  $5 \mu L$  TFA; **E** : after addition of  $100 \mu L$  glacial AcOH at  $t = 0$  and **F** : after 16h.

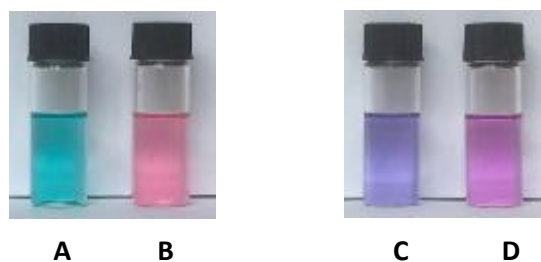

Figure S37: Photographic images of compound **4** and **5** before (A and C) and after addition of HCl 0.1M (B and D)

**A** : Compound **4** at  $10^{-5}M$  in  $CH_2Cl_2$  as reference; **B** : after addition of  $5 \mu L$  HCl 0.1 M solution in  $CH_2Cl_2$   
**C** : Compound **5** at  $10^{-5}M$  in  $CH_2Cl_2$  as reference; **D** : after addition of  $5 \mu L$  HCl 0.1 M solution in  $CH_2Cl_2$

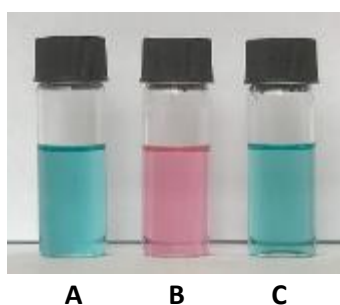

Figure S38: Photographic images of compound **4** (A) in the presence of HCl (B) and after addition of imidazole (C)

**A** : Compound **4** at  $10^{-5}M$  in  $CH_2Cl_2$  as reference ; **B** : after addition of  $5 \mu L$  HCl 0.1 M solution in  $CH_2Cl_2$ ; **C** : after sequential addition of  $100 \mu L$  Imidazole  $10^{-3}M$  in  $CH_2Cl_2$ .

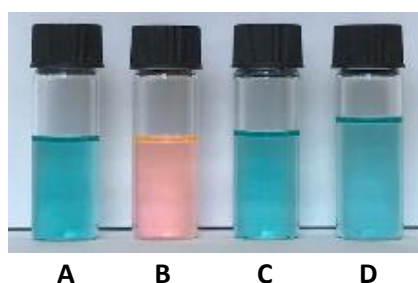

Figure S39: Photographic images of compound **4** (A) and in the presence of  $H^+PPh_3, BF_4^-$  (B) and demonstration of the reversibility after addition of imidazole (C), shown after 10 cycles of protonation-deprotonation (D)

**A** : Compound **4** at  $10^{-5}M$  in  $CH_2Cl_2$  as reference ; **B** : after addition of  $50 \mu L$   $H^+PPh_3, BF_4^-$   $10^{-3}M$  in  $CH_2Cl_2$ ; **C** : after addition of  $50 \mu L$   $H^+PPh_3, BF_4^-$   $10^{-3}M$  in  $CH_2Cl_2$  then  $50 \mu L$  Imidazole  $10^{-3}M$  in  $CH_2Cl_2$ ; **D** : after 10 cycles of subsequent addition of  $50 \mu L$   $H^+PPh_3, BF_4^-$   $10^{-3}M$  in  $CH_2Cl_2$  then  $50 \mu L$  Imidazole  $10^{-3}M$  in  $CH_2Cl_2$

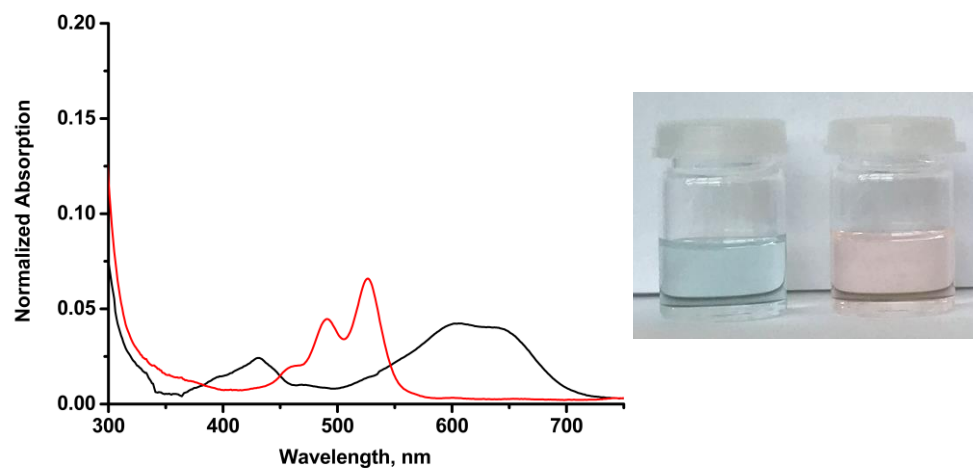

Figure S40: UV-Visible spectra of iminophosphorane-PDI 4 at  $10^{-6}$  M in  $\text{CH}_2\text{Cl}_2$  (black) and after addition of a solution of  $\text{H}^+\text{PPh}_3\text{BF}_4^-$   $10^{-3}$  M in  $\text{CH}_2\text{Cl}_2$  (red). Photographic images of compound 4 (4 mL) (left) and after addition of a solution  $\text{H}^+\text{PPh}_3\text{BF}_4^-$   $10^{-3}$  M (100  $\mu\text{L}$ ) (right).

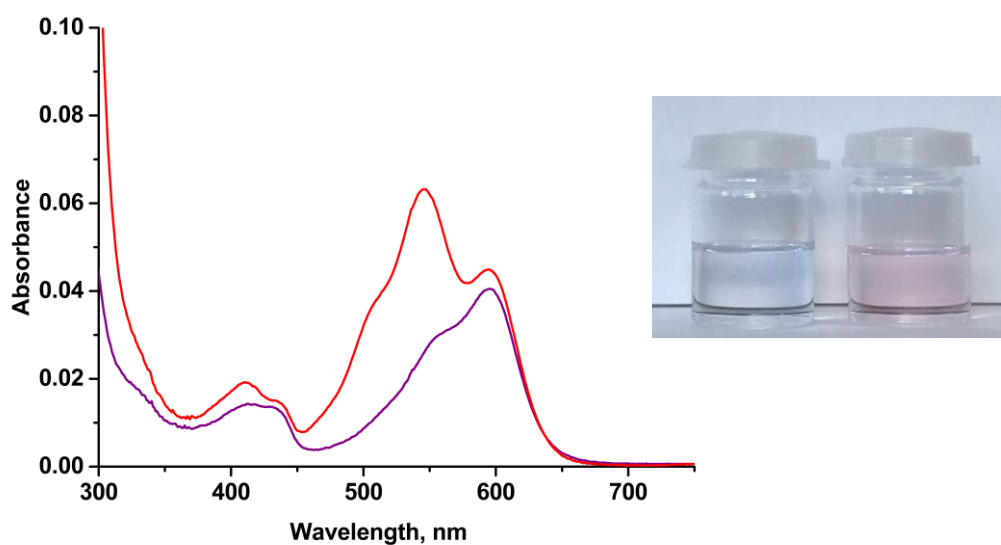

Figure S41: UV-Visible spectra of iminophosphorane-PDI 5 at  $10^{-6}$  M in  $\text{CH}_2\text{Cl}_2$  (violet) and after addition of a solution of  $\text{H}^+\text{PPh}_3\text{BF}_4^-$   $10^{-3}$  M in  $\text{CH}_2\text{Cl}_2$  (red). Photographic images of compound 5 (4 mL) (left) and after addition of a solution  $\text{H}^+\text{PPh}_3\text{BF}_4^-$   $10^{-3}$  M (100  $\mu\text{L}$ ) (right).

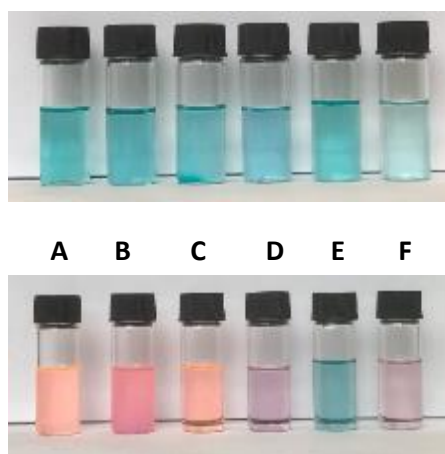

Figure S42: Photographic images of compound **4** (A) in different solvents (top) and after addition of  $H^+PPh_3, BF_4^-$  (bottom)

Top : Compound **4** at  $10^{-5}M$  in **A** :  $CH_2Cl_2$ , **B** : Toluene, **C** : EtOAc ; **D** :  $Et_2O$  ; **E** : DMF ; **F** : EtOH

Bottom : Compound **4** after addition of  $HBF_4.Et_2O$  (5  $\mu L$ )

It is noted that no change of colour was occurring in DMF suggesting a preferential protonation of the solvent

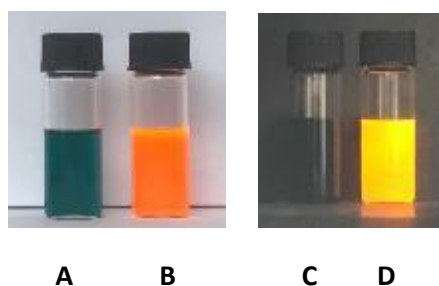

Figure S43: Photographic images of compound **4** at  $10^{-4} M$  in  $CH_2Cl_2$  solution (A) and after addition of 10  $\mu L$   $HBF_4.Et_2O$  (B). Under emission lamp at 420 nm for compound **4** (C) and for protonated form (D).

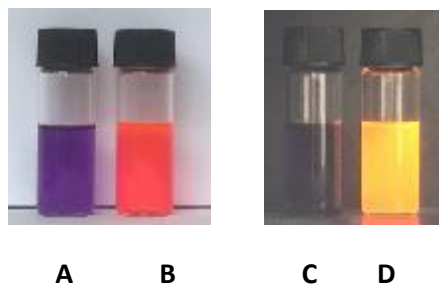

Figure S44: Photographic images of compound **5** at  $10^{-4} M$  in  $CH_2Cl_2$  solution (A) and after addition of 10  $\mu L$   $HBF_4.Et_2O$  (B). Under emission lamp at 420 nm for compound **5** (C) and for protonated form (D).

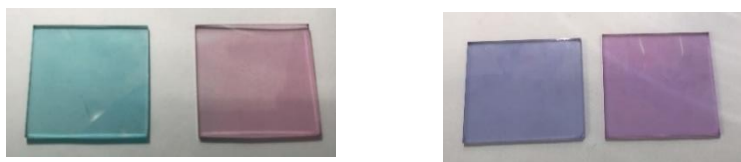

*Figure S45: Iminophosphorane PDI 4 (left) in thin film (blue colour) and after addition HCl vapors (pink colour). Iminophosphorane PDI 5 (right) in thin film (violet colour) and after addition HCl vapors (magenta colour).*
